# Supplementary material for: A ruthenium racemisation catalyst for the synthesis of primary amines from secondary amines
Source: Royal Society of Chemistry journal article supplement (doi:10.1039/c6dt01525e), 2016-01-01
Supplement: c6dt01525e1.pdf [file c6dt01525e1.pdf]

# A Ruthenium Racemization Catalyst for Synthesis of Primary Amines from Secondary Amines: Catalysis and Deactivation

Dennis Pinggen,<sup>a</sup> Cigdem Altintas, Max Schaller, Dieter Vogt.<sup>b\*</sup>

<sup>a</sup> Dr. D.L.L. Pinggen, Chemical Materials Science, Department of Chemistry, University of Konstanz, Universitätsstrasse 10, 78457 Konstanz, Germany

<sup>b</sup> Prof Dr. D. Vogt, EaStCHEM, School of Chemistry, University of Edinburgh, King's Buildings, Joseph Black Building, West Mains Road, Edinburgh EH9 3JJ, Scotland, UK, E-mail: [D.Vogt@ed.ac.uk](mailto:D.Vogt@ed.ac.uk)

## Contents

|                        |    |
|------------------------|----|
| General considerations | 2  |
| Synthesis              | 2  |
| Catalysis              | 3  |
| Spectroscopy           | 4  |
| Mass spectrometry      | 15 |
| GC-Analysis            | 26 |
| References             | 26 |

## General Considerations

All work was carried out under standard Schlenk conditions under argon; all solvents were dried, degassed and purged with Ar prior to use. All used glassware was pre-dried at 120°C and heated with a heat gun while purged with Ar prior to use. Chemicals were purchased from Sigma-Aldrich and Strem and were used as received. All reactions were performed in a magnetically stirred home-made stainless steel autoclave equipped with manometer, temperature controller and sampling unit (50µL samples). The reactions were all performed in triplo, and these results were within an experimental error. <sup>1</sup>H, <sup>13</sup>C, <sup>31</sup>P NMR spectra were recorded on a Bruker Avance 400 MHz with broad band inverse detection probe and a Bruker Avance 500 MHz with dual channel cryo probe optimized for <sup>13</sup>C/<sup>1</sup>H (DCH). Chemical shifts are reported in ppm using TetraMethylSilane (TMS) as reference. All NMR experiments have been performed under inert atmosphere in airtight Wilmad Young NMR quartz tubes. GC-analyses were performed on a Shimadzu GC-2010 equipped with an Ultra-2 column. Ammonia of purity grade N4.7 was used and was introduced to the autoclaves using a Bronkhorst liquiFlow mass-flow controller (MFC). FT-IR spectra were recorded *in situ* on a Shimadzu 8300 equipped with a home-made autoclave with a built-in ZnS path length window.

## Synthesis

### *Synthesis of 1,2,3,4,5-Pentaphenylcyclopentadiene:<sup>[1]</sup>*

A three-neck round-bottom flask was charged with magnesium turnings (0.513 g, 20 mmol) and THF (5 ml). A solution of PhBr (3.807 g, 23 mmol) in THF (20 ml) was added drop wise into the stirring solution. This mixture was stirred for one hour and a solution of 2,3,4,5-tetraphenylcyclopentadienone (5.049 g, 13 mmol) in THF (20 ml) was added via a dropping funnel. 10 ml of extra THF were necessary to wash all 2,3,4,5-tetraphenylcyclopentadienone back into the mixture. After 2.25 h of stirring, LiAlH<sub>4</sub> (1.45 g, 35 mmol) was added in portions. After two more hours, the reaction was quenched using NH<sub>4</sub>Cl (18.6g, 0.35mol) in H<sub>2</sub>O which had been prepared in the meanwhile. Following that, the mixture was transferred into a separation funnel and dichloromethane was added. After five washes the organic layer was dried over MgSO<sub>4</sub>. After filtration the solvent was removed in vacuum. The product was obtained as a pale white-yellow powder. NMR. <sup>1</sup>H NMR (298 K, 400 MHz, CDCl<sub>3</sub>, δ=ppm): 7.23 (t, 2H, Ph), 7.22 (d, 2H, Ph), 7.17 (m, 8H, Ph), 7.12 (d, 1H, Ph), 7.05 (m, 8H, Ph), 7.00 (m, 4H, Ph) 5.08 (s, 1H, Cp). <sup>13</sup>C NMR (298 K, 100.6 MHz, CDCl<sub>3</sub>): 144.02, 136.16, 135.82, 130.13, 129.03, 128.57, 127.69, 126.96.

### *Synthesis of (η<sup>5</sup>-CpPh<sub>5</sub>)Ru(CO)<sub>2</sub>H:<sup>[1]</sup>*

1,2,3,4,5-pentaphenylcyclopentadiene (2 g, 4.4 mmol) and [Ru<sub>3</sub>(CO)<sub>12</sub>] (1 g, 1.56 mmol) were put in a 50 ml Schlenk tube and flushed with Ar. Afterwards, decane (12 ml) and toluene (6 ml) were added and the mixture was heated for 2.5 days at 160°C. After cooling to room temperature it was washed with pentane and dried in vacuum. The obtained powder was of dark brown colour. <sup>1</sup>H NMR (298 K, 400 MHz, CDCl<sub>3</sub>, δ=ppm): 7.23 (t, 10H, Ph), 7.13 (t, 10H, Ph), 7.05 (d, 5H, Ph), -9.84 (s, 1H, RuH). <sup>13</sup>C NMR (298 K, 100.6 MHz, CDCl<sub>3</sub>): 196.89 (CO), 132.16, 129.54, 128.36, 127.82, 106.46 .IR (cm<sup>-1</sup>): 2009, 1952 (CO).

### *Synthesis of (η<sup>5</sup>-CpPh<sub>5</sub>)Ru(CO)<sub>2</sub>Cl:<sup>[1]</sup>*

1,2,3,4,5-pentaphenylcyclopentadiene (0.27 g, 0.6 mmol) and [Ru<sub>3</sub>(CO)<sub>12</sub>] (0.143 g, 0.22 mmol) were put in a 20 ml Schlenk tube and flushed with argon. Afterwards decane (1.6 ml) and toluene (0.82 ml) were

added and the mixture was heated for 2.5 days at 160°C. After cooling to room temperature CHCl<sub>3</sub> (2 ml) was added and the mixture was heated to 160°C for 1.25 h. After cooling to room temperature it was washed with pentane and dried in vacuum. The obtained powder was yellow. <sup>1</sup>H NMR (298 K, 400 MHz, CDCl<sub>3</sub>, δ=ppm): 7.23 (t, 10H, Ph), 7.13 (t, 10H, Ph), 7.07 (d, 5H, Ph). <sup>13</sup>C NMR (298 K, 100.6 MHz, CDCl<sub>3</sub>): 196.92 (CO), 132.20, 129.59, 128.40, 127.85, 106.50. ESI-MS: 639.1709 (M+H).

#### *Synthesis of (η<sup>5</sup>-CpPh<sub>5</sub>)Ru(CO)(PPh<sub>3</sub>)Cl.<sup>[2]</sup>*

A Schlenk tube was charged with (η<sup>5</sup>-CpPh<sub>5</sub>) Ru(CO)<sub>2</sub>Cl (103 mg) and PPh<sub>3</sub> (49 mg). Dichloromethane (2.5 ml) was added as solvent. Trimethylamine-N-oxide (23.5 mg) was dissolved in acetonitrile (1 ml) in another Schlenk tube. The acetonitrile solution was slowly added to the dichloromethane solution and the mixture was stirred for 15 minutes at room temperature. The colour changed from yellow via orange to dark red during the addition. The mixture was filtered over silica employing dichloromethane as solvent. A red powder was obtained after evaporating the solvents. <sup>1</sup>H NMR (298 K, 300 MHz, CDCl<sub>3</sub>, δ=ppm): 7.48 (t, 6H, Ph), 7.34 (t, 3H, Ph), 7.16 (t, 6H, Ph), 7.11 (t, 5H, Ph), 6.92 (t, 10H, Ph), 6.81 (d, 10H, Ph). <sup>13</sup>C NMR (298 K, 100.6 MHz, CDCl<sub>3</sub>): 132.38, 127.93, 127.27, 127.17. <sup>31</sup>P NMR (298K, 161.9 MHz, CDCl<sub>3</sub>): 39.08. ESI-MS: 575.1061 (M-Cl-PPh<sub>3</sub>).

## Catalysis

### *General procedure for the splitting of secondary amines:*

A 75 ml stainless-steel autoclave is charged with 2 mol% of complex and purged with Ar. Secondary amine and t-amylalcohol were added via syringe. The autoclave is closed and liquid NH<sub>3</sub> was added via a mass flow controller (MFC). The mixture was heated to 170°C for the 23.5 h time.

**Table S1: Catalyst screening**

| Complex                   | Time (h) | NH <sub>3</sub> (mL), eq | Conversion (%) | Primary Amine (%) <sup>c</sup> | Primary Amine Selectivity (%) <sup>c</sup> |
|---------------------------|----------|--------------------------|----------------|--------------------------------|--------------------------------------------|
| <b>1</b>                  | 24       | 5, 120                   | 81.5±5         | 76.5±4                         | 94                                         |
| <b>2<sup>a</sup></b>      | 24       | 5, 120                   | 22.5±2         | 22.5±2                         | 100                                        |
| <b>3</b>                  | 24       | 5, 120                   | 26.5±2         | 25.0±2                         | 94                                         |
| <b>1+KO<sup>t</sup>Bu</b> | 23.75    | 15, 120                  | 0              | 0                              | 0                                          |
| <b>1</b>                  | 21       | 0.5, 12                  | 54±3           | 53±3                           | 98                                         |
| <b>2</b>                  | 21       | 0.5, 12                  | 13±1           | 11±1                           | 85                                         |
| <b>3</b>                  | 21.5     | 0.5, 12                  | 68.5±4         | 62±3                           | 90                                         |
| <b>1+KO<sup>t</sup>Bu</b> | 21.5     | 0.5, 12                  | 23.5±2         | 23.5±2                         | 100                                        |

Complex (2 mol%), dicyclohexylamine (1.5 mmol), tert-amyl alcohol (3 mL), NH<sub>3</sub>(l), 170°C. a) 0.75 mL MTBE as co-solvent. b) 2 mol% KO<sup>t</sup>Bu added. c) standard deviation over 3 experiments.

**Table S2: Ammonia Excess Screening**

| Entry    | Time (h) | NH <sub>3</sub> (mL), eq | Conversion (%) <sup>c</sup> | Primary Amine (%) <sup>c</sup> |
|----------|----------|--------------------------|-----------------------------|--------------------------------|
| <b>1</b> | 23.5     | 5, 120                   | 81.5±5                      | 76.5±4                         |
| <b>2</b> | 21       | 2.5, 60                  | 82.5±3                      | 78±2                           |
| <b>3</b> | 23.5     | 5, 40                    | 61                          | 58.5±3                         |
| <b>4</b> | 24       | 2.5, 20                  | 51±3                        | 47.5±2                         |
| <b>5</b> | 21       | 0.5, 12                  | 54±3                        | 53±2                           |
| <b>6</b> | 23.5     | 0.5, 4                   | 16.5±1                      | 15.5±1                         |

Complex **1** (2 mol%), dicyclohexylamine (1.5 mmol), tert-amyl alcohol (3 mL), NH<sub>3</sub>(l), 170°C. a) 0.75 mL MTBE as co-solvent. b) 2 mol% KO<sup>t</sup>Bu added. c) standard deviation over 3 experiments.

**Table S3: Screening of complex 3**

| Entry    | Time (h) | NH <sub>3</sub> (eq) | Conversion (%) <sup>a</sup> | Primary Amine (%) <sup>a</sup> |
|----------|----------|----------------------|-----------------------------|--------------------------------|
| <b>1</b> | 24       | 4                    | 15±1                        | 6±1                            |
| <b>2</b> | 21.5     | 12                   | 68.5±3                      | 62±2                           |
| <b>3</b> | 23       | 20                   | 29±2                        | 27.5±2                         |
| <b>4</b> | 23       | 60                   | 26±2                        | 26±2                           |
| <b>5</b> | 24       | 120                  | 26.5±2                      | 25.0±2                         |

Complex **3** (2 mol%), dicyclohexylamine (1.5 mmol), tert-amyl alcohol (3 mL), NH<sub>3</sub>(l), 170°C. a) standard deviation over 3 experiments.

**Table S4: Effect of the base at different amounts of ammonia**

| Entry    | Time  | NH <sub>3</sub> (mL), eq | Conversion (%) <sup>a</sup> | Primary Amine (%) <sup>a</sup> |
|----------|-------|--------------------------|-----------------------------|--------------------------------|
| <b>1</b> | 23.5  | 0.5, 4                   | 42±3                        | 39.5±4                         |
| <b>2</b> | 21.5  | 0.5, 12                  | 23.5±2                      | 23.5±2                         |
| <b>3</b> | 24    | 2.5, 20                  | 63.5±1                      | 58±2                           |
| <b>4</b> | 23.5  | 5, 40                    | 18±1                        | 17±1                           |
| <b>5</b> | 23.75 | 7.5, 60                  | 6.5±1                       | 6.5±1                          |
| <b>6</b> | 23.75 | 15, 120                  | 0                           | 0                              |

Complex **1** (2 mol%, 0.03 mmol), dicyclohexylamine (1.5 mmol), KO<sup>t</sup>Bu (2 mol%, 0.03 mmol) tert-amyl alcohol (3 mL), NH<sub>3</sub>(l), 170°C. a) standard deviation over 3 experiments.

**Table S5: Reaction temperature of 150°C in the splitting of dicyclohexylamine**

| Entry    | Time | NH <sub>3</sub> (mL), eq | Conversion (%) <sup>a</sup> | Primary Amine (%) <sup>a</sup> |
|----------|------|--------------------------|-----------------------------|--------------------------------|
| <b>1</b> | 16   | 2.5, 20                  | 26±2                        | 22±2                           |
| <b>2</b> | 24   | 5, 120                   | 41±3                        | 39±3                           |

Complex **1** (2 mol%, 0.03 mmol), dicyclohexylamine (1.5 mmol), KO<sup>t</sup>Bu (2 mol%, 0.03 mmol) tert-amyl alcohol (3 mL), NH<sub>3</sub>(l), 150°C. a) standard deviation over 3 experiments.

## Spectroscopy

*Procedure for the NMR reactions:*

*Reaction of complex 1 with cyclohexylamine:*

Into a Wilmad-Young NMR tube, complex **1** (0.073 mmol, 46.6 mg) was weighed and dissolved in CDCl<sub>3</sub>. <sup>1</sup>H and <sup>13</sup>C NMR spectra were recorded and after that, 10 eq. cyclohexylamine (0.73 mmol, 63 μL) were added. Again, both <sup>1</sup>H and <sup>13</sup>C NMR were recorded and the mixture was left at room temperature for 18h. After this time, both <sup>1</sup>H and <sup>13</sup>C were recorded. The mixture was heated to 60°C for 1 h.

*Reaction of complex 1 with secondary amine and primary amine:*

In a Wilmad-Young NMR tube, complex **1** (0.09 mmol, 32.7 mg) was weighed and dissolved in CDCl<sub>3</sub>. <sup>1</sup>H and <sup>13</sup>C NMR spectra were recorded and after that, 10 eq. dicyclohexylamine (0.5 mmol, 99.4 μL) were added. Again, both <sup>1</sup>H and <sup>13</sup>C NMR were recorded and the mixture was heated to 60°C for 4h. Spectra were recorded again and the mixture was continued to heat at 60°C for 4 days. <sup>1</sup>H and <sup>13</sup>C NMR revealed no change.

*Reaction of complex 1 with ammonia and cyclohexylamine:*

In a 15 mL stainless steel autoclave, complex **1** (0.09 mmol, 57 mg) was placed. CDCl<sub>3</sub> was added to dissolve the mixture and NH<sub>3</sub> (2.5 mL, 90 mmol) was subsequently added via a Mass Flow controller. The autoclave was closed and heated to 170°C for 1.45 h. After cooling to room temperature, the resulting mixture was transferred to a Wilmad-Young NMR tube and <sup>1</sup>H and <sup>13</sup>C NMR were recorded. After that, 10 eq. cyclohexylamine (0.9 mmol, 89 mg, 0.1 mL) were added. Again, both <sup>1</sup>H and <sup>13</sup>C NMR were recorded and the mixture was left at room temperature for 18h. After this time, both <sup>1</sup>H and <sup>13</sup>C were recorded.

*Reaction of complex 3 with cyclohexylamine:*

In a Wilmad-Young NMR tube, complex **3** (0.05 mmol, 39.1 mg) was weighed and dissolved in CDCl<sub>3</sub>. <sup>1</sup>H and <sup>13</sup>C NMR spectra were recorded and after that, 11.4 eq. cyclohexylamine (65 μL, 0.57 mmol) were added. Both <sup>1</sup>H and <sup>13</sup>C NMR were recorded and the mixture was left at room temperature for 18h. After this time, both <sup>1</sup>H and <sup>13</sup>C NMR were recorded. The mixture was heated to 90°C for 6 h. Again, both <sup>1</sup>H and <sup>13</sup>C NMR were recorded. The mixture was heated again to 90°C for 2 days before recording the spectra again.

*In situ FT-IR monitoring*

In a home-made stainless steel autoclave equipped with a ZnS path length cell, 6 mL CHCl<sub>3</sub> (dry degassed) was placed and a background was recorded for further use. At the same time, complex **1** (0.1 mmol, 63.8 mg) was weighed into a Schlenk tube and dissolved in dry degassed CHCl<sub>3</sub>. The autoclave was emptied and dried before purging it with Ar again. The solution of complex **1** was transferred to the autoclave and a spectrum was recorded again. After this, cyclohexylamine (1 mmol, 115 μL) was added and the autoclave was sealed and heated to 40°C. Spectra were recorded with 15 minutes time intervals.

*NMR spectroscopy*

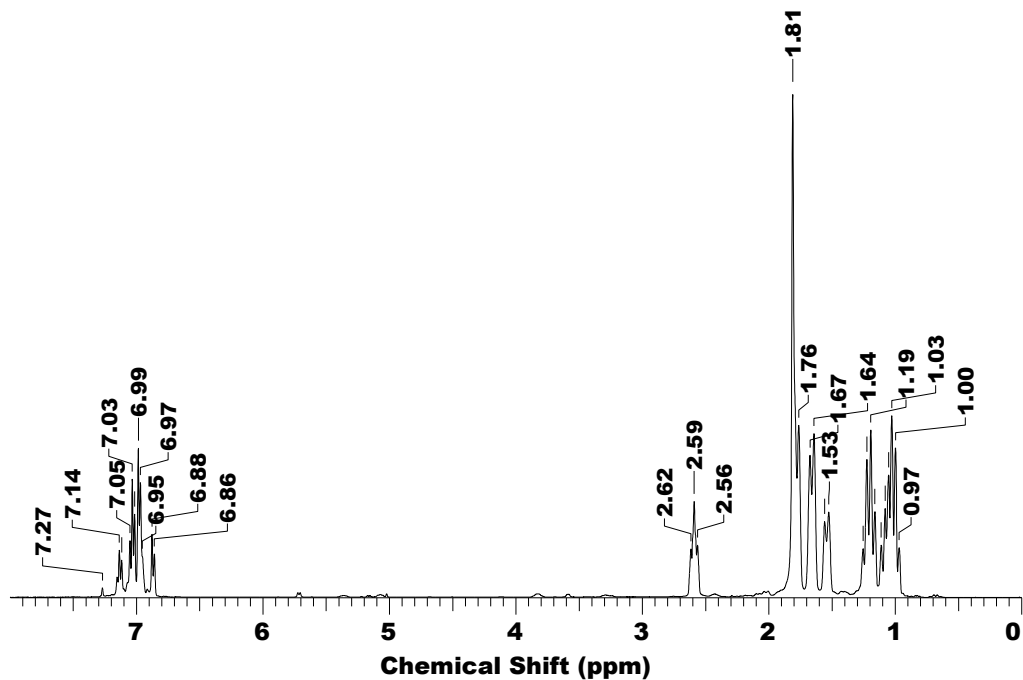

Figure S1:  $^1\text{H}$  NMR ( $\text{CDCl}_3$ , 400 MHz, 298K) of complex 1 with 10 eq. of cyclohexylamine immediately after the addition. The peak at 1,81ppm resembles the free amine

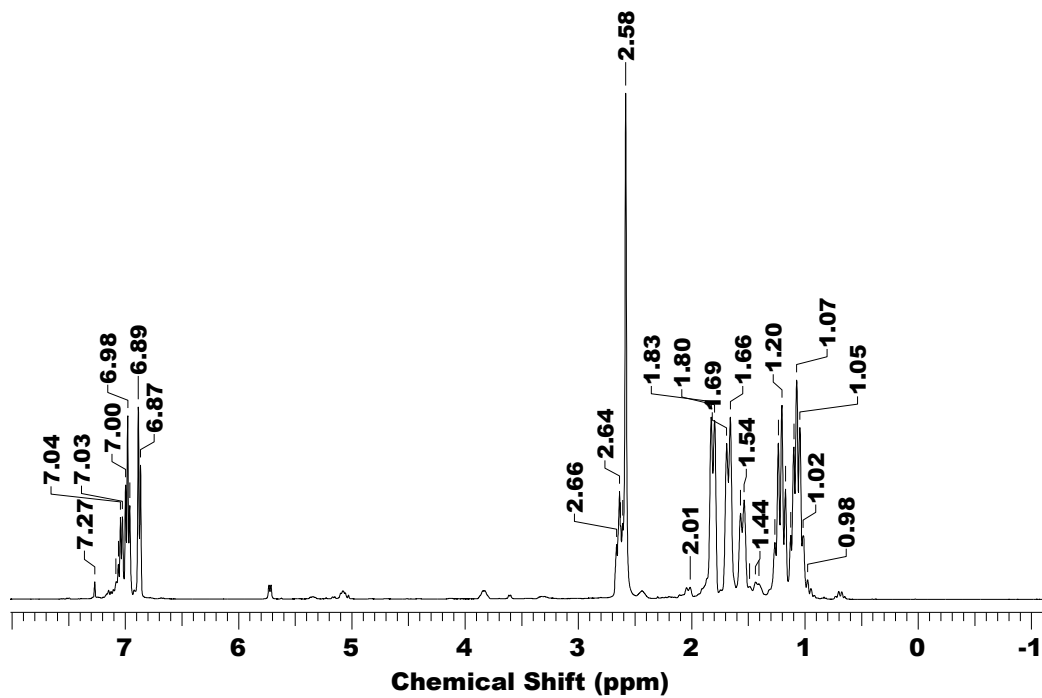

Figure S2:  $^1\text{H}$  NMR ( $\text{CDCl}_3$ , 400 MHz, 298K) of complex 1 with 10 eq. of cyclohexylamine after 18 h at r.t.. The peak originated from 2.09 ppm is now shifted completely to 2.58 ppm.

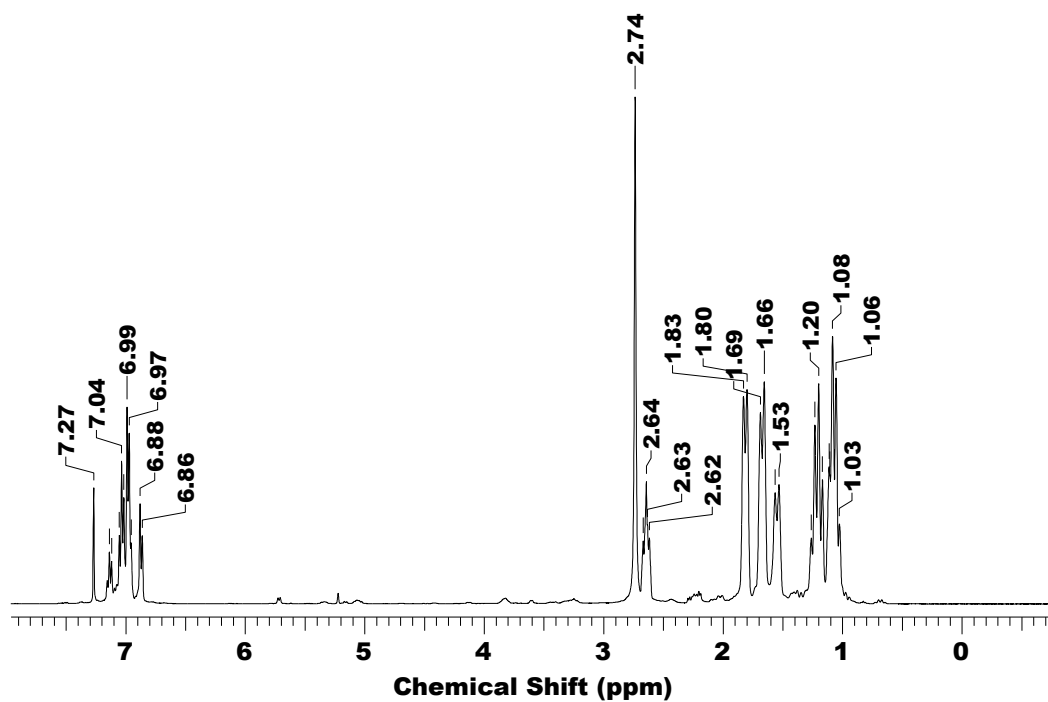

Figure S3:  $^1\text{H}$  NMR ( $\text{CDCl}_3$ , 400 MHz, 298K) of complex 1 with 10 eq. of cyclohexylamine after 18 h at r.t. followed by 1 h at  $60^\circ\text{C}$ . The peak originated from 2.58 ppm is now shifted completely to 2.74 ppm.

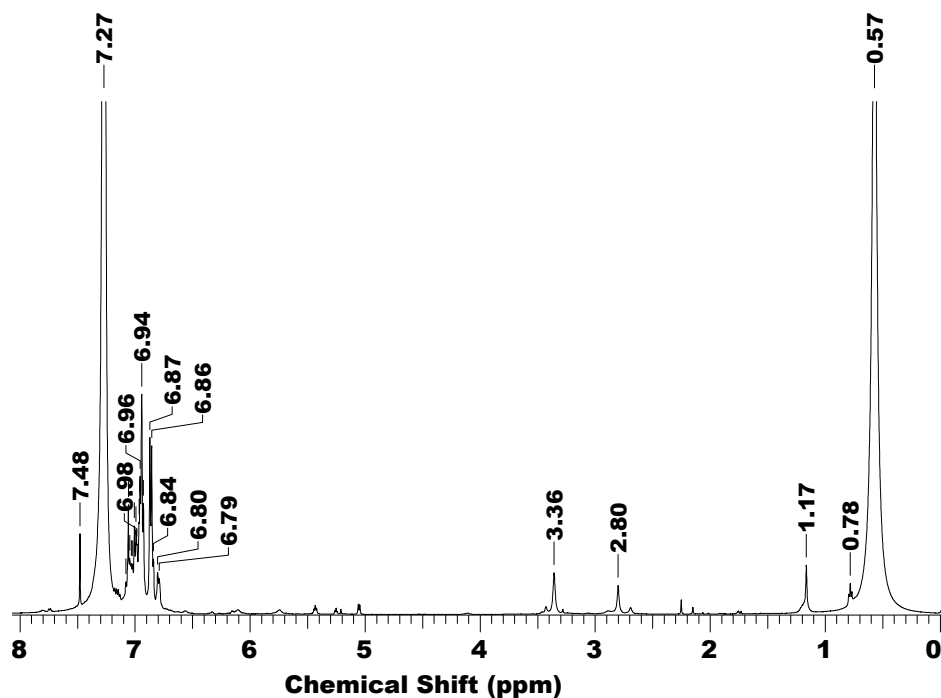

Figure S4:  $^1\text{H}$  (500 MHz,  $\text{CDCl}_3$ , 298K) spectrum of  $\text{Ru}(\text{CpPh}_5)(\text{CO})_2\text{Cl}$  (1) after the reaction with  $\text{NH}_3$  ( $170^\circ\text{C}$ , 1.45 h,  $\text{CDCl}_3$ ). The peak at 0.57 ppm is free  $\text{NH}_3$ ; coordinated  $\text{NH}_3$  can be found at 3.36 and 2.80 ppm.

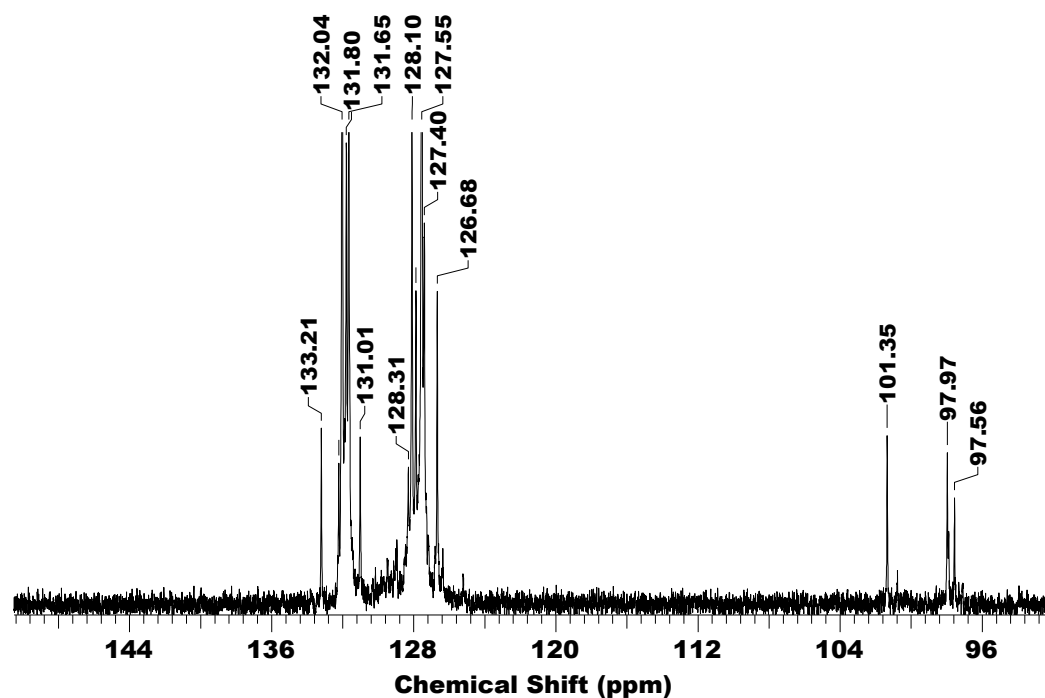

Figure S5:  $^{13}\text{C}$  NMR (125.73 MHz,  $\text{CDCl}_3$ , 298 K) spectrum of  $\text{Ru}(\text{CpPh}_5)(\text{CO})_2\text{Cl}$  (1) after the reaction with  $\text{NH}_3$  followed by addition of 10 eq. n-hexylamine at r.t..



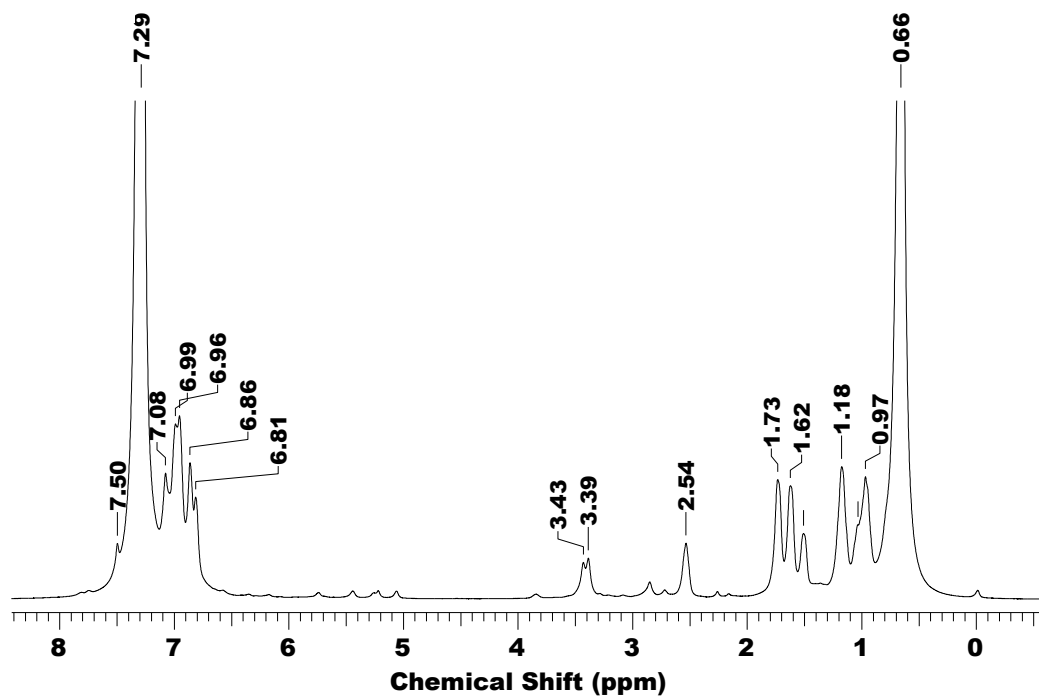

Figure S6:  $^1\text{H}$  (500 MHz,  $\text{CDCl}_3$ , 298K) spectrum of  $\text{Ru}(\text{CpPh}_5)(\text{CO})_2\text{Cl}$  (1) after the reaction with  $\text{NH}_3$  followed by the addition of 10 eq. cyclohexylamine. The peak at 0.66 ppm is free  $\text{NH}_3$ ; coordinated cyclohexylamine can be found at 2.54 ppm.

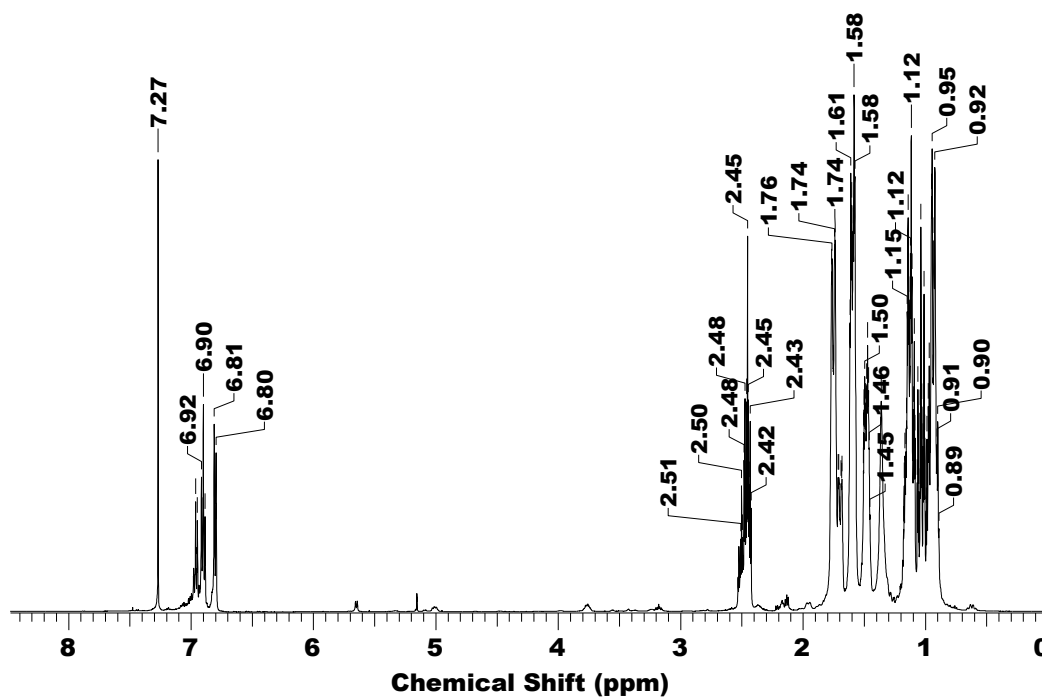

Figure S7:  $^1\text{H}$  (500 MHz,  $\text{CDCl}_3$ , 298K) spectrum of  $\text{Ru}(\text{CpPh}_5)(\text{CO})_2\text{Cl}$  (1) immediately after the addition of 10 eq. dicyclohexylamine.

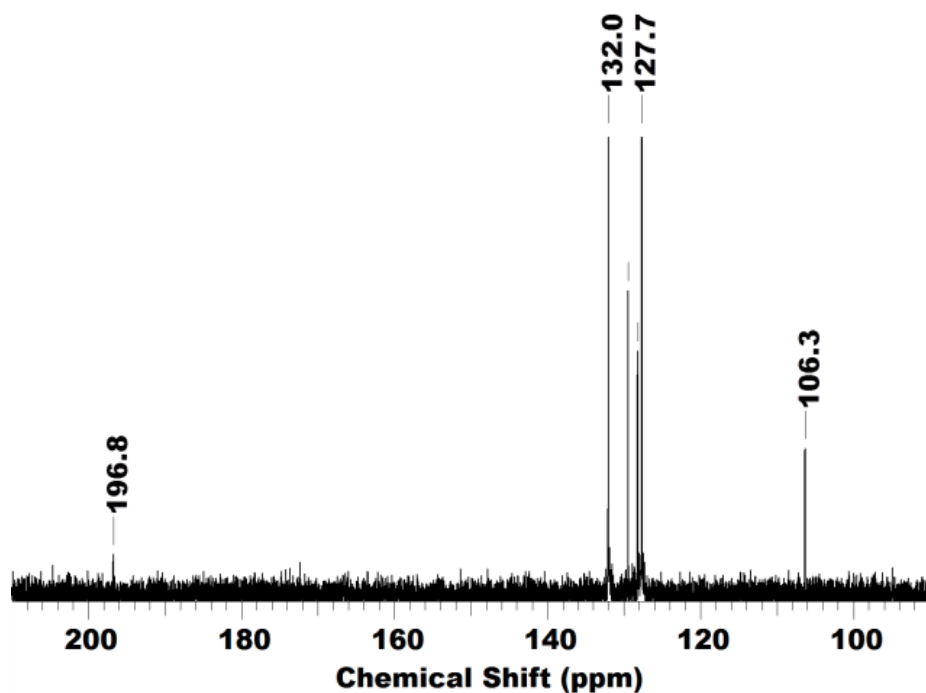

Figure S8:  $^{13}\text{C}$  NMR (125.73 MHz,  $\text{CDCl}_3$ ) spectrum of  $\text{Ru}(\text{CpPh}_5)(\text{CO})_2\text{Cl}$  with 10 eq. dicyclohexylamine after 18 h at r.t..

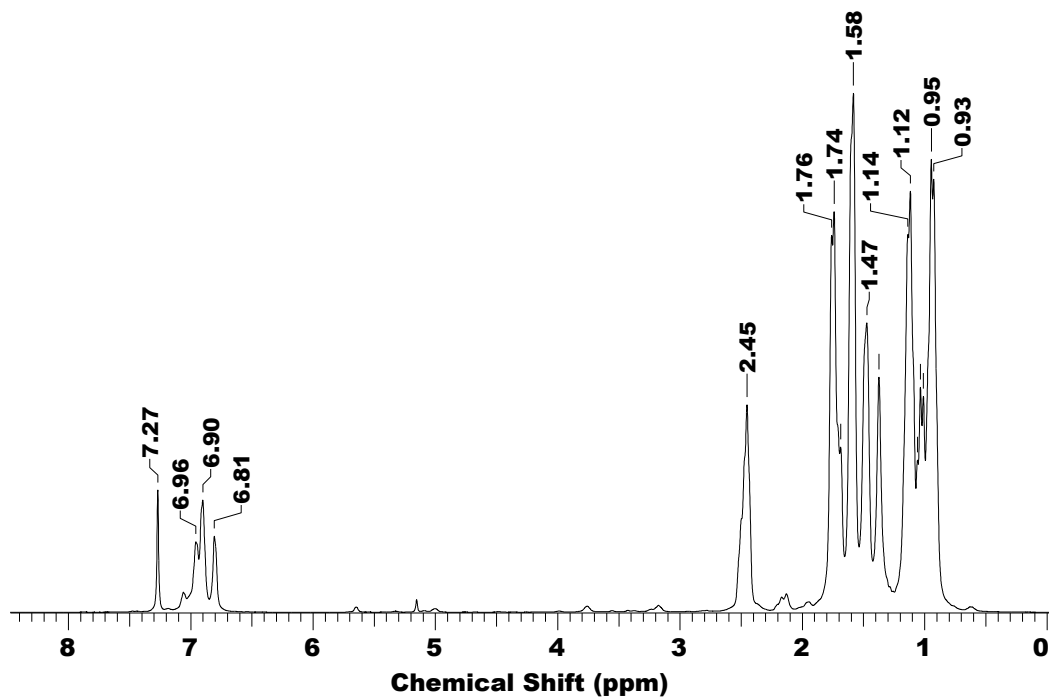

Figure S9:  $^1\text{H}$  (500 MHz,  $\text{CDCl}_3$ , 298K) spectrum of  $\text{Ru}(\text{CpPh}_5)(\text{CO})_2\text{Cl}$  (1) after the addition of 10 eq. dicyclohexylamine and heated to  $60^\circ\text{C}$  for 4 h.

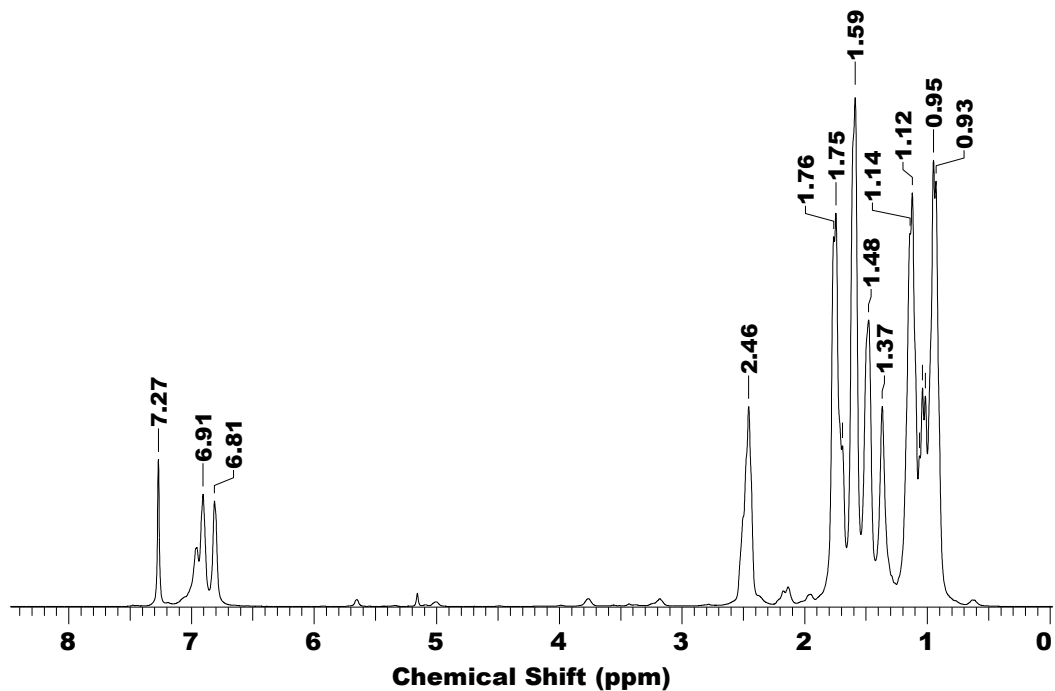

Figure S10:  $^1\text{H}$  (500 MHz,  $\text{CDCl}_3$ , 298K) spectrum of  $\text{Ru}(\text{CpPh}_5)(\text{CO})_2\text{Cl}$  (1) after the addition of 10 eq. cyclohexylamine and heated to  $60^\circ\text{C}$  for 4 days.

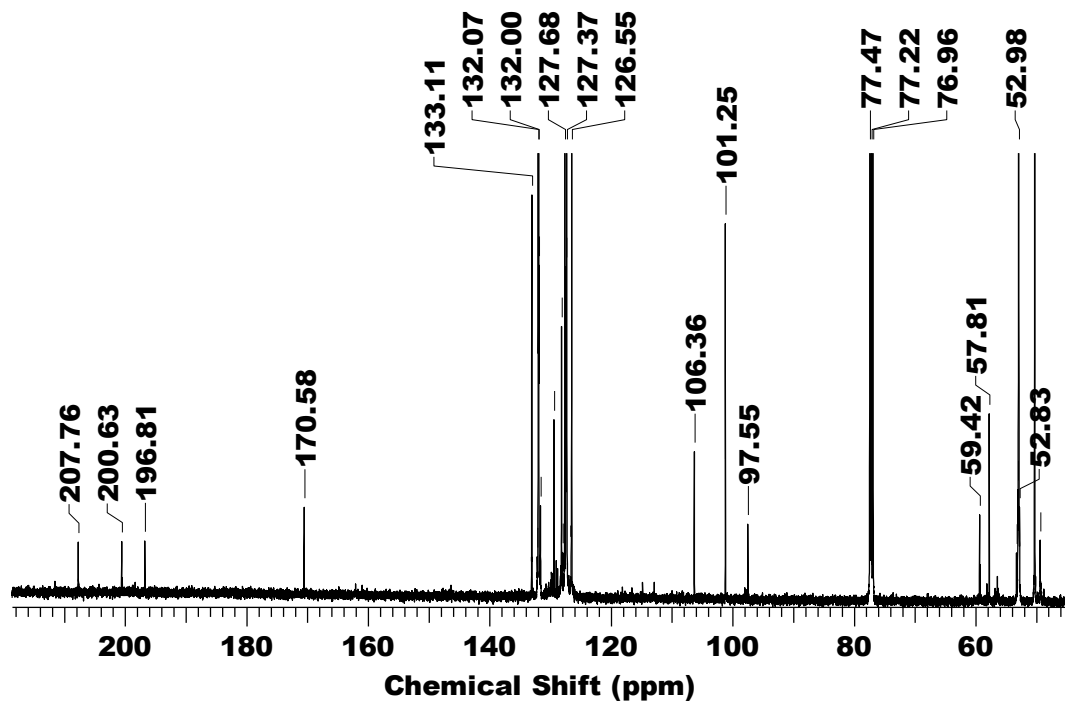

Figure S11:  $^{13}\text{C}$  NMR (125.73 MHz,  $\text{CDCl}_3$ , 298 K) spectrum of  $\text{Ru}(\text{CpPh}_5)(\text{CO})_2\text{Cl}$  (1) with 10 eq. cyclohexylamine after 4 h at  $60^\circ\text{C}$ .

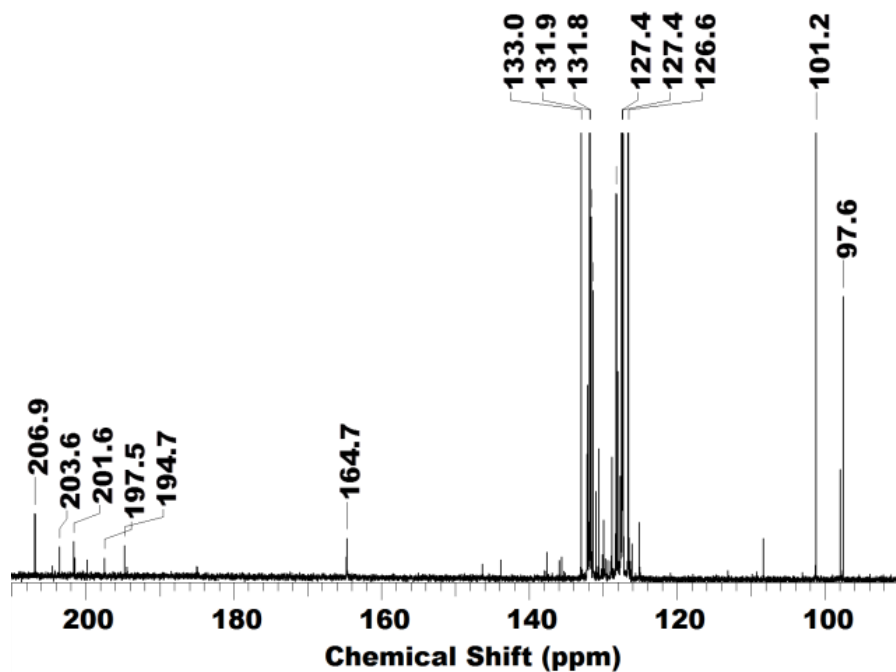

Figure S12:  $^{13}\text{C}$  NMR (125.73 MHz,  $\text{CDCl}_3$ , 298 K) spectrum of Ru(CpPh<sub>5</sub>)(CO)<sub>2</sub>Cl (1) with 10 eq. n-hexylamine after 6 h at 90°C.

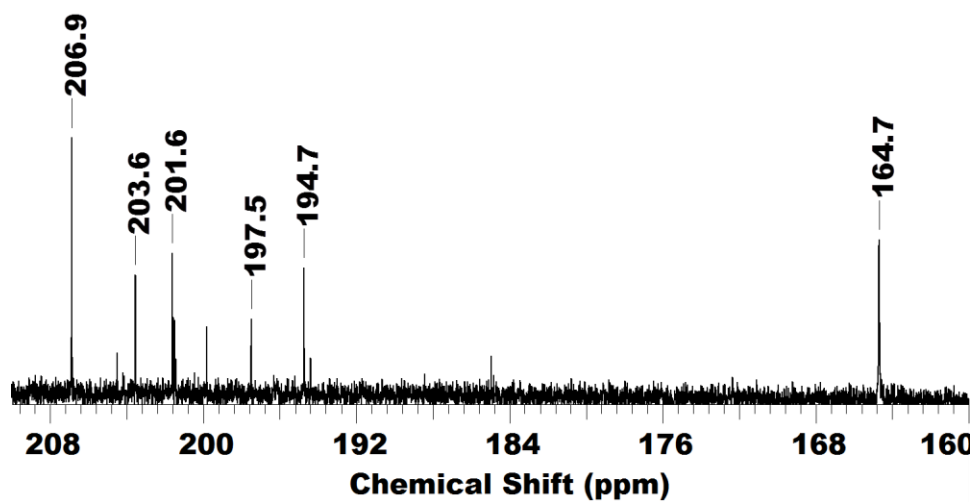

Figure S13:  $^{13}\text{C}$  NMR (125.73 MHz,  $\text{CDCl}_3$ , 298 K) spectrum of Ru(CpPh<sub>5</sub>)(CO)<sub>2</sub>Cl (1) with 10 eq. n-hexylamine after 6 h at 90°C (zoomed carbonyl region).

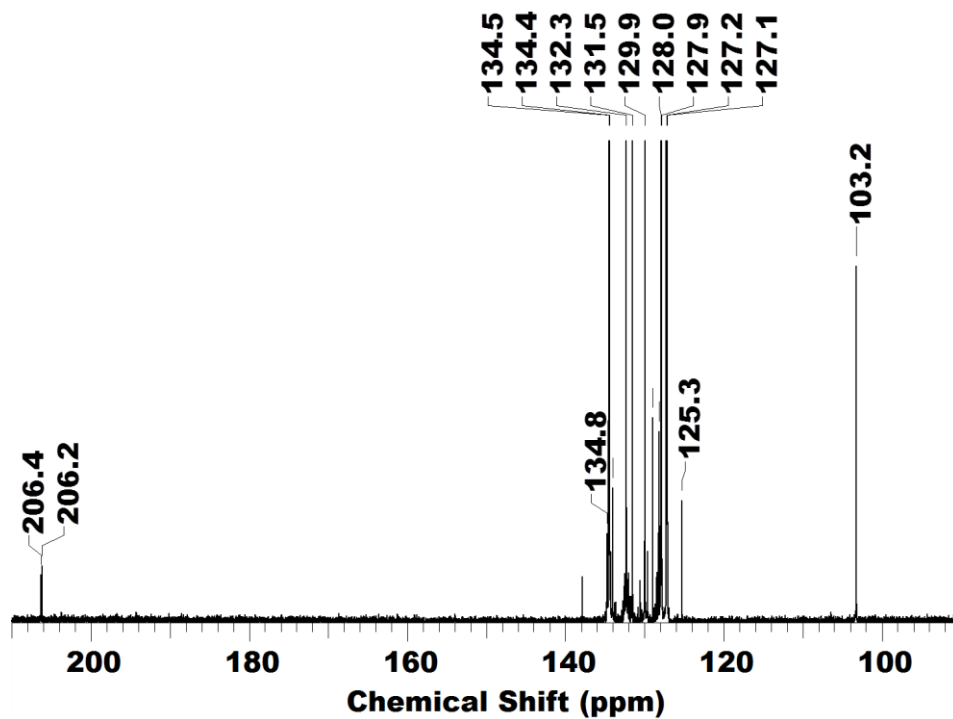

Figure S14:  $^{13}\text{C}$  NMR (125.7 MHz, 298 K,  $\text{CDCl}_3$ , 298 K) spectrum of  $\text{Ru}(\text{CpPh}_5)(\text{CO})(\text{PPh}_3)\text{Cl}$  (3).  $J_{\text{CP}}=25.8$  Hz.

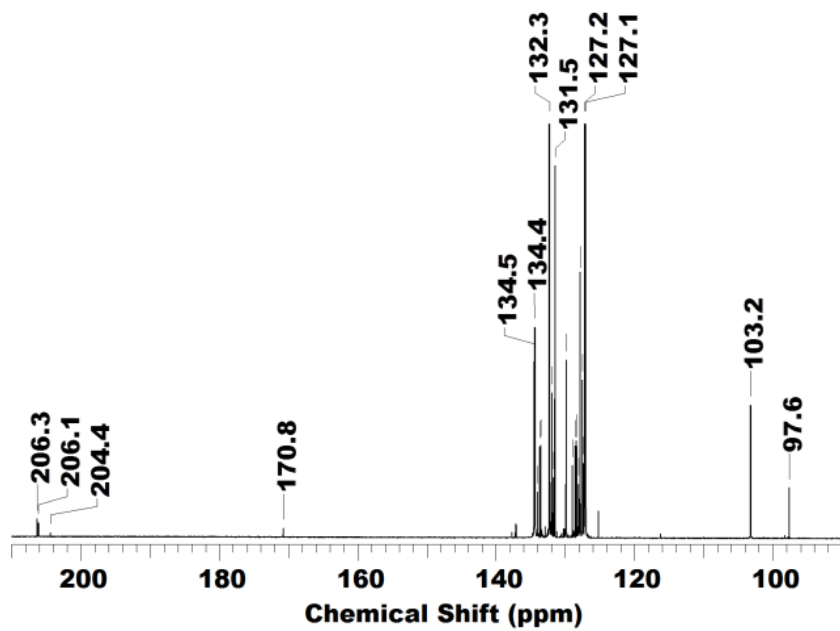

Figure S15:  $^{13}\text{C}$  NMR (125.73 MHz,  $\text{CDCl}_3$ , 298 K) spectrum of 3 with 10 eq. cyclohexylamine after 6 h at  $90^\circ\text{C}$ .

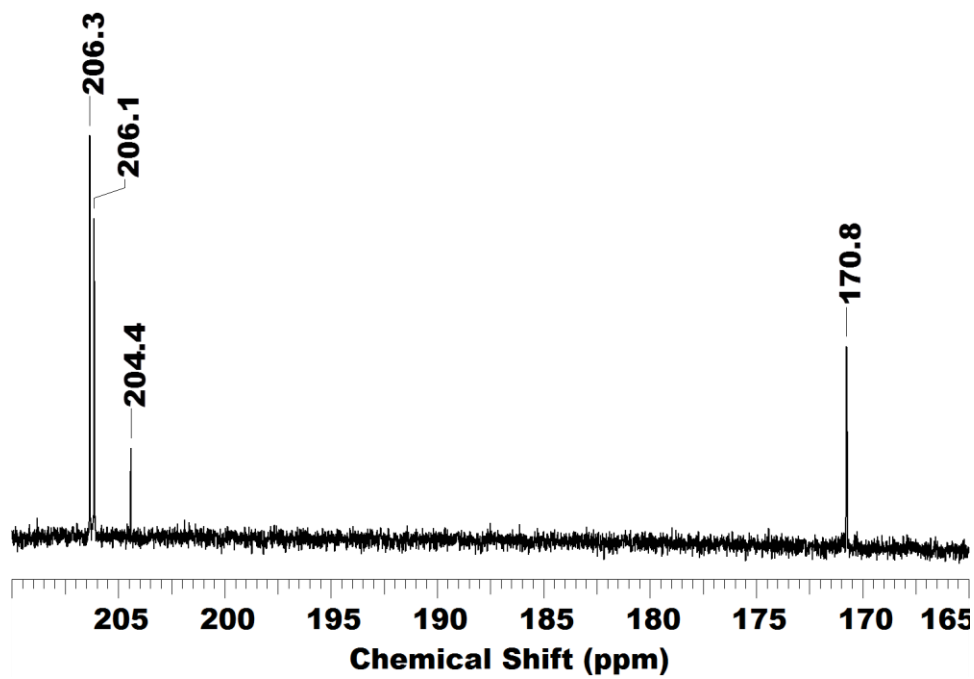

Figure S16:  $^{13}\text{C}$  NMR (125.73 MHz,  $\text{CDCl}_3$ , 298 K) spectrum of 3 with 10 eq. cyclohexylamine after 2 days at  $90^\circ\text{C}$  (zoomed carbonyl region).

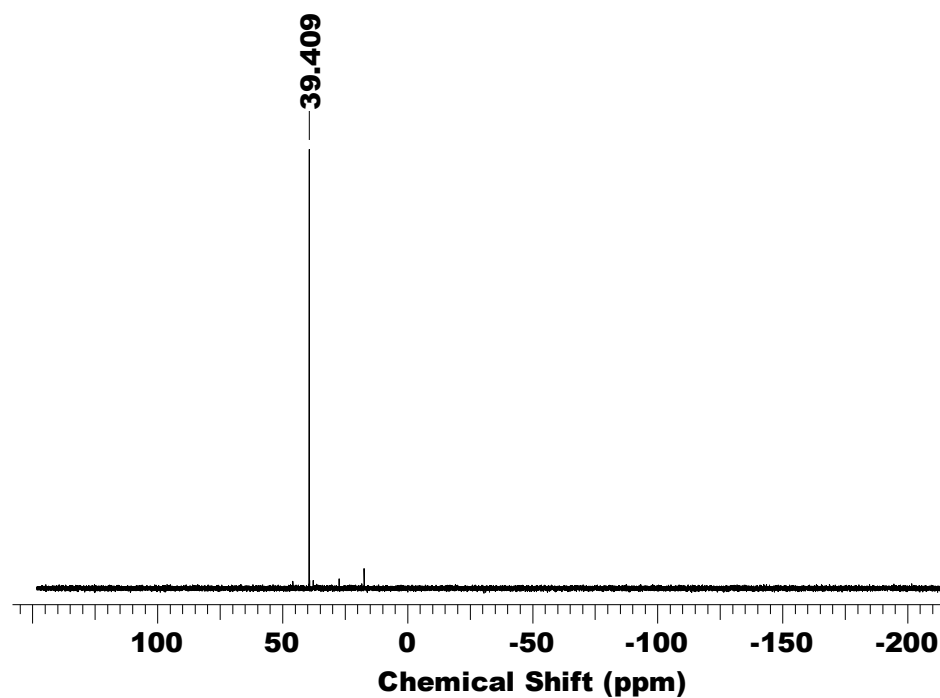

Figure S17:  $^{31}\text{P}$  NMR (168 MHz,  $\text{CDCl}_3$ , 298 K) spectrum of 3 without additives.

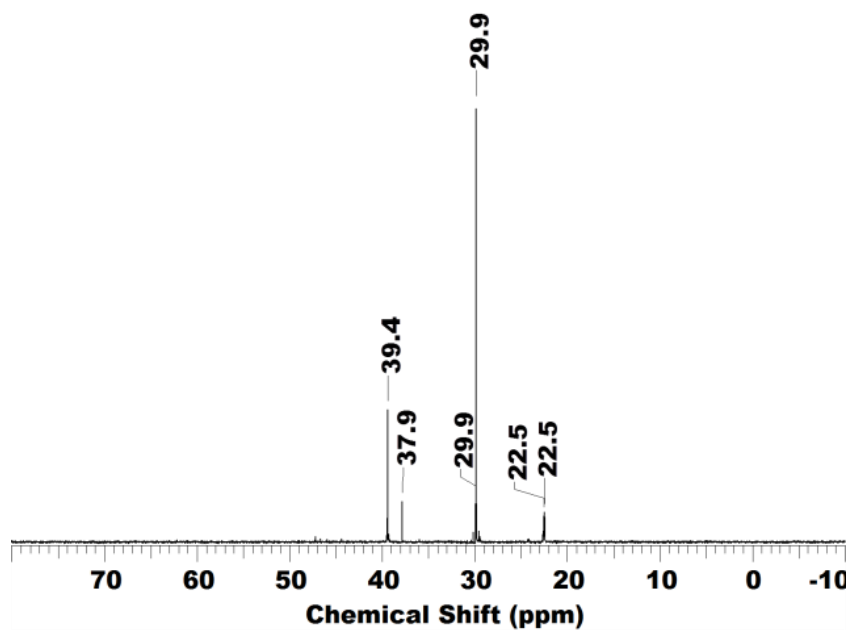

Figure S18:  $^{31}\text{P}$  NMR (168 MHz,  $\text{CDCl}_3$ , 298 K) spectrum of 3 with 10 eq. cyclohexylamine after 2 days at  $90^\circ\text{C}$ .

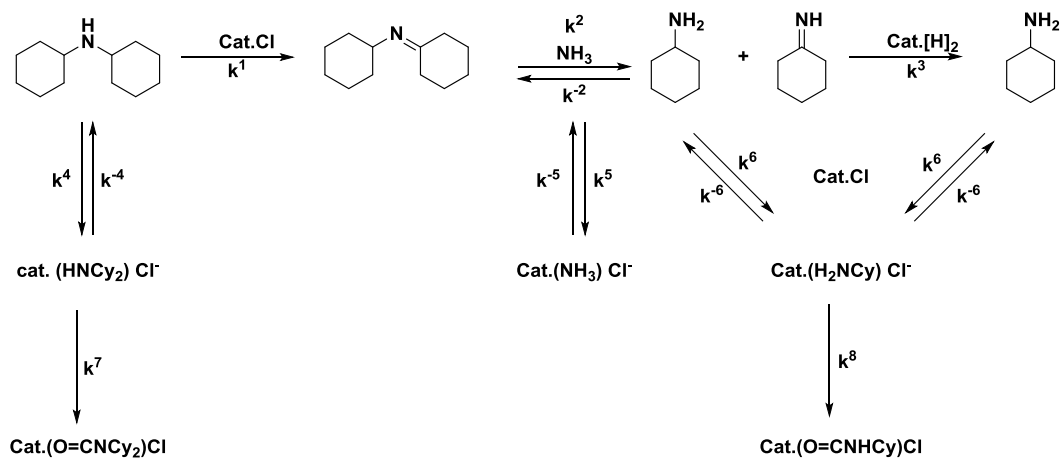

Figure S19: Equilibria in the splitting of dicyclohexylamine, including catalyst deactivation.

## Mass spectrometry

With complex **1**:

Complex **1** (164 mg, 0.257 mmol) + 40 eq. cyclohexylamine (1.18 mL, 10.28 mmol) heated to 130°C overnight in t-amylalcohol (5 mL). The solvent from the resulting mixture was evaporated and the remaining powder was subjected to ESI-MS.

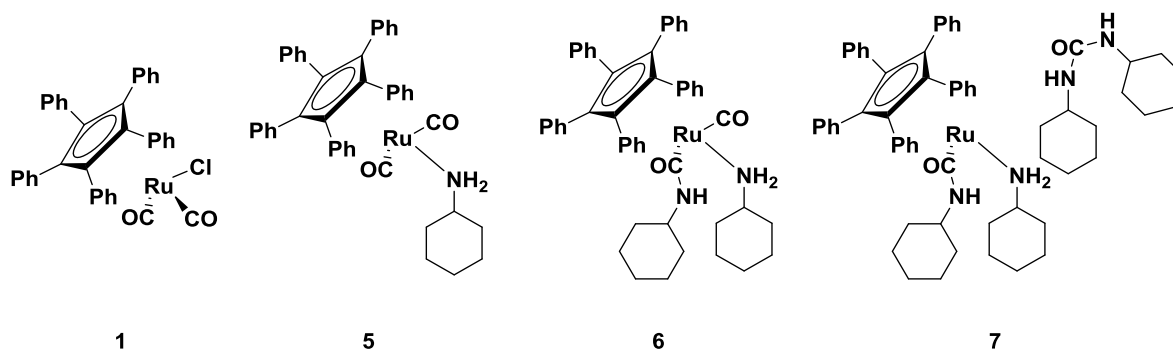

Table S5: ESI-MS data obtained from complex **1** with 40 equiv. cyclohexylamine, heated to 130°C for 16 h.

| Entry | Mass found | Corresponding complex                                                                                 |
|-------|------------|-------------------------------------------------------------------------------------------------------|
| 1     | 1424       | 2x <b>6</b> -2Cyclohexylamine+Na                                                                      |
| 2     | 1269       | <b>6</b> + <b>1</b> -3CO+2Na-Cyclohexylamine-Cl                                                       |
| 3     | 1185       | 2x <b>1</b> -2CO-Cl                                                                                   |
| 4     | 1147       | 2x <b>1</b> -Cl-3CO+Na/ <b>6</b> -CO+<br>RuHCl+K+Cyclohexylamine+Cyclohexylimine<br>(dehydrogenation) |
| 5     | 1048       | <b>6</b> -CO+RuHCl+K+Cyclohexylimine                                                                  |
| 6     | 993        | <b>7</b> -H <sub>2</sub> (imine formation)                                                            |
| 7     | 949        | <b>6</b> -CO-Cyclohexylamine+<br>RuHCl+K+Cyclohexylimine                                              |
| 8     | 914        | <b>6</b> -CO-Cyclohexylamine+<br>RuH+K+Cyclohexylimine                                                |
| 9     | 855        | <b>xx</b>                                                                                             |
| 10    | 818        | <b>6</b> -CO-Cyclohexylamine+ RuHCl+K+H                                                               |
| 11    | 773        | <b>6</b> +H-CO/ <b>5</b> -CO+Cyclohexylamine                                                          |
| 12    | 756        | <b>xx</b> -Cyclohexylamine                                                                            |
| 13    | 702        | <b>5</b>                                                                                              |
| 14    | 639        | <b>1</b>                                                                                              |



# Display Report

**Analysis Info**  
Analysis Name: D:\Data\Alans Data April\2014\280414 Dennis Pingen 1058DP14.d  
Method: 240414\ALANstune\_low.m  
Sample Name: Dennis Pingen 1058DP14  
Comment: Dennis Pingen 1058DP14

Acquisition Date: 4/28/2014 11:52:23 AM  
Operator: Bruker UK  
Instrument: micrOTOF  
8213750.10408

**Acquisition Parameter**

|             |            |                      |          |                  |           |
|-------------|------------|----------------------|----------|------------------|-----------|
| Source Type | ESI        | Ion Polarity         | Positive | Set Nebulizer    | 0.4 Bar   |
| Focus       | Not active | Set Capillary        | 4500 V   | Set Dry Heater   | 180 °C    |
| Scan Begin  | 50 m/z     | Set End Plate Offset | -500 V   | Set Dry Gas      | 4.0 l/min |
| Scan End    | 3000 m/z   |                      |          | Set Divert Valve | Waste     |

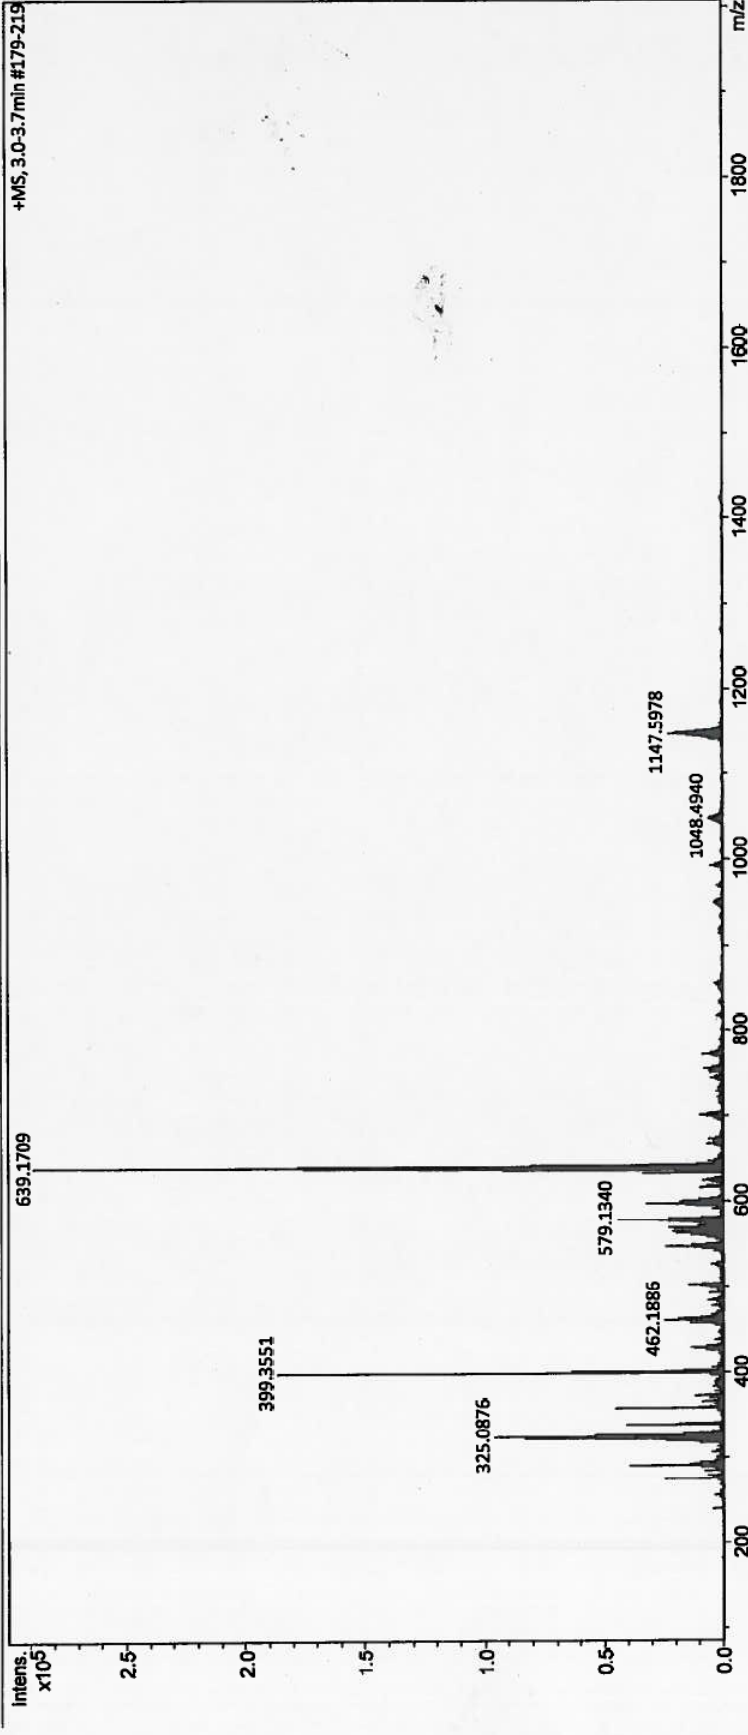

# Display Report

**Analysis Info**  
 Analysis Name: D:\Data\Alans Data April\2014\280414 Dennis Pingen 1058DP14.d  
 Method: 240414\ALANstune\_low.m  
 Sample Name: Dennis Pingen 1058DP14  
 Comment: Dennis Pingen 1058DP14  
 Acquisition Date: 4/28/2014 11:52:23 AM  
 Operator: Bruker UK  
 Instrument: micrOTOF  
 8213750.10408

**Acquisition Parameter**  
 Source Type: ESI  
 Focus: Not active  
 Scan Begin: 50 m/z  
 Scan End: 3000 m/z  
 Ion Polarity: Positive  
 Set Nebulizer: 0.4 Bar  
 Set Dry Heater: 180 °C  
 Set Dry Gas: 4.0 l/min  
 Set Divert Valve: Waste

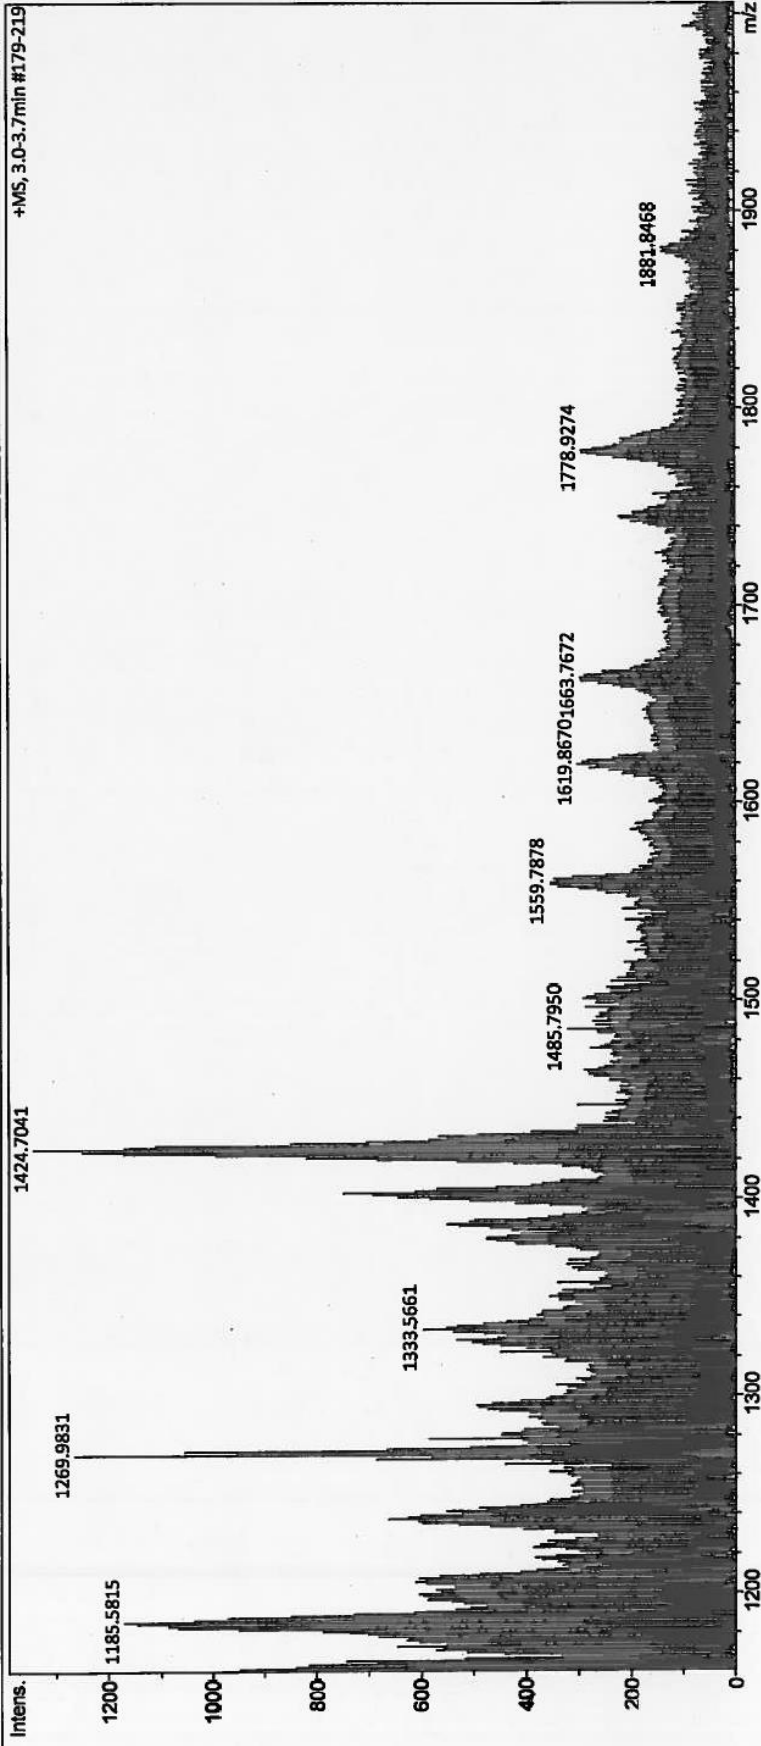

# Display Report

**Analysis Info**  
 Analysis Name: D:\Data\Ians Data April\2014\280414 Dennis Pingen 1058DP14.d  
 Method: 240414ALANstune\_low.m  
 Sample Name: Dennis Pingen 1058DP14  
 Comment: Dennis Pingen 1058DP14  
 Acquisition Date: 4/28/2014 11:52:23 AM  
 Operator: Bruker UK  
 Instrument: micrOTOF  
 8213750.10408

**Acquisition Parameter**  
 Source Type: ESI  
 Focus: Not active  
 Scan Begin: 50 m/z  
 Scan End: 3000 m/z  
 Ion Polarity: Positive  
 Set Nebulizer: 0.4 Bar  
 Set Dry Heater: 180 °C  
 Set Dry Gas: 4.0 l/min  
 Set Divert Valve: Waste

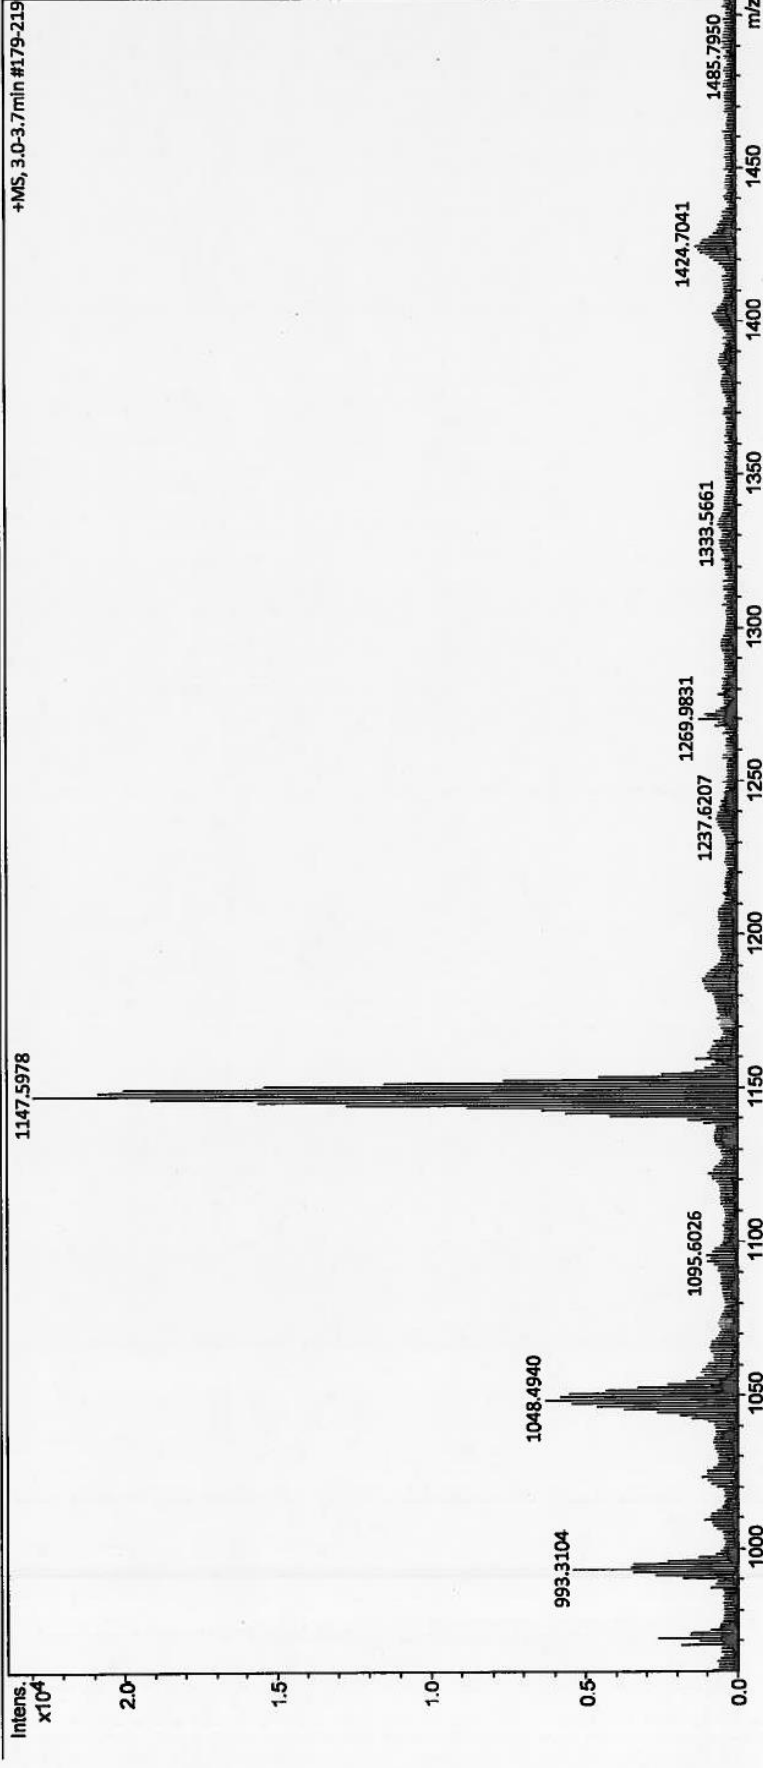

# Display Report

**Analysis Info**  
 Analysis Name: D:\Data\Alans Data April2014\280414 Dennis Pingen 1058DP14.d  
 Method: 240414ALANstune\_low.m  
 Sample Name: Dennis Pingen 1058DP14  
 Comment: Dennis Pingen 1058DP14  
 Acquisition Date: 4/28/2014 11:52:23 AM  
 Operator: Bruker UK  
 Instrument: microTOF  
 8213750.10408

**Acquisition Parameter**  
 Source Type: ESI  
 Focus: Not active  
 Scan Begin: 50 m/z  
 Scan End: 3000 m/z  
 Ion Polarity: Positive  
 Set Nebulizer: 0.4 Bar  
 Set Dry Heater: 180 °C  
 Set Dry Gas: 4.0 l/min  
 Set Divert Valve: Waste  
 Set Capillary: 4500 V  
 Set End Plate Offset: -500 V

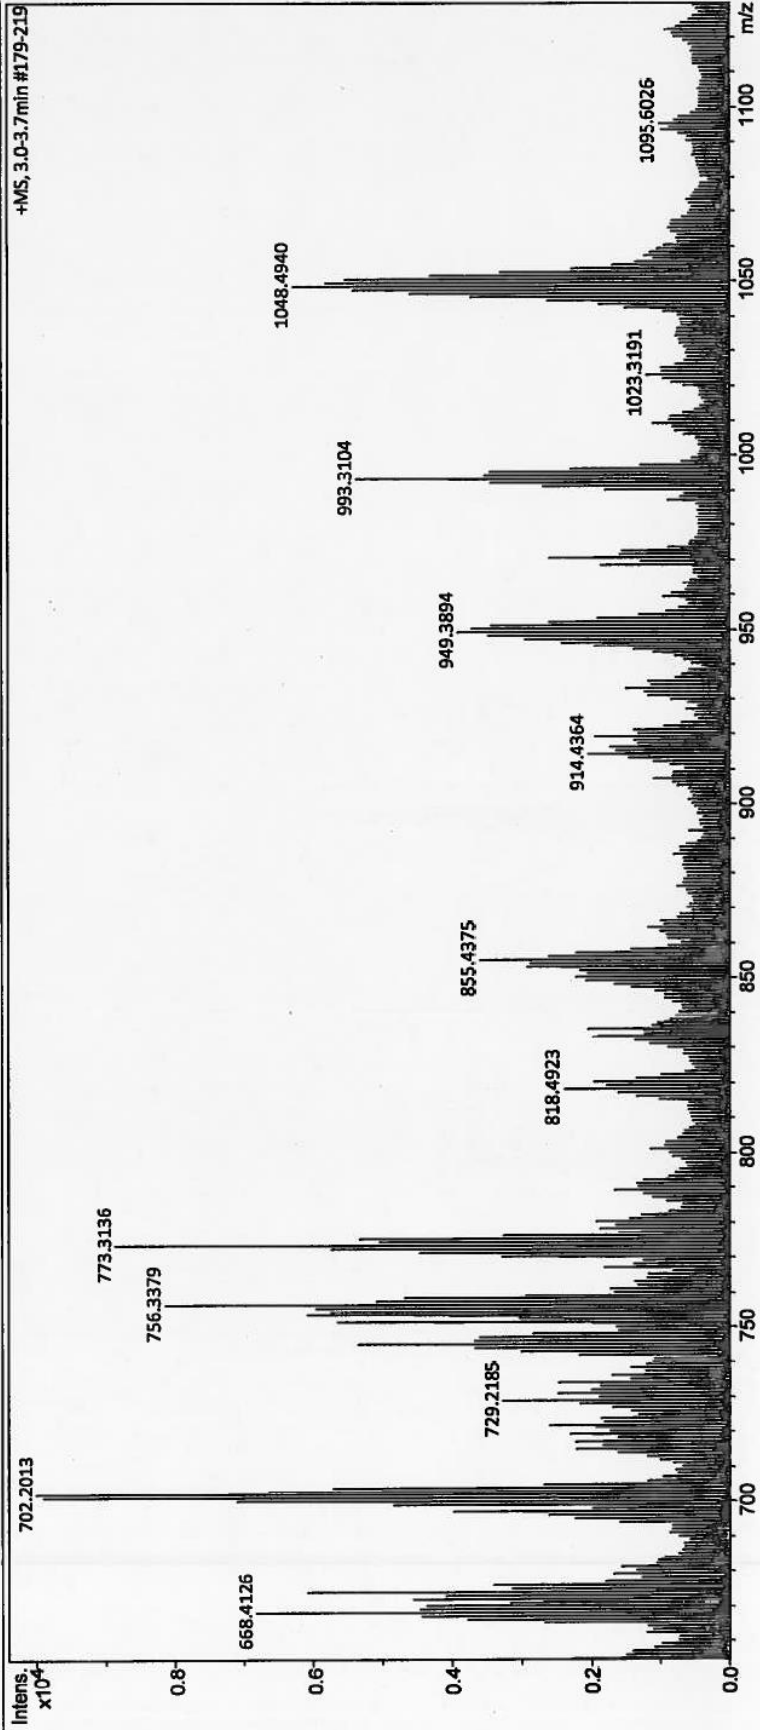

# Display Report

**Analysis Info**  
 Analysis Name: D:\Data\Ians Data April 2014\280414 Dennis Pingen 1058DP14.d  
 Method: 240414\ALANstune\_low.m  
 Sample Name: Dennis Pingen 1058DP14  
 Comment: Dennis Pingen 1058DP14

Acquisition Date: 4/28/2014 11:52:23 AM  
 Operator: Bruker UK  
 Instrument: micrOTOF  
 8213750.10408

**Acquisition Parameter**  
 Source Type: ESI  
 Focus: Not active  
 Scan Begin: 50 m/z  
 Scan End: 3000 m/z

Ion Polarity: Positive  
 Set Nebulizer: 0.4 Bar  
 Set Dry Heater: 180 °C  
 Set Dry Gas: 4.0 l/min  
 Set Divert Valve: Waste

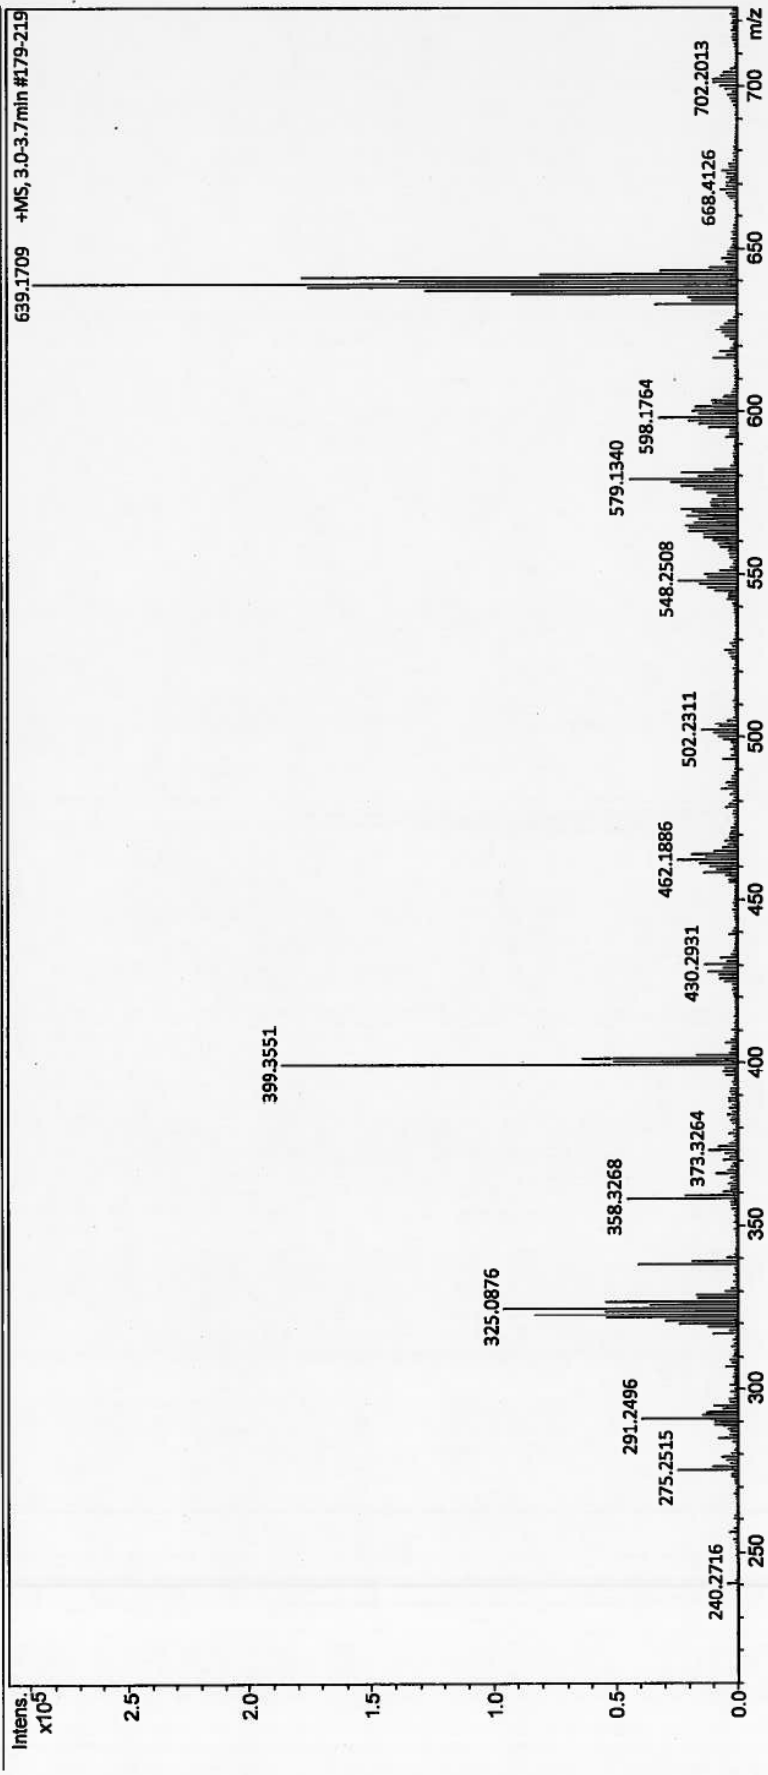

With complex 3:

Complex 3 (63.8 mg, 0.1 mmol) was heated to 100°C in CHCl<sub>3</sub> (8 mL) in an autoclave in the presence of 10 equiv cyclohexylamine (115 μL, 0.57 mmol). After evaporation of the solvent, the resulting mixture was subjected to ESI-MS.

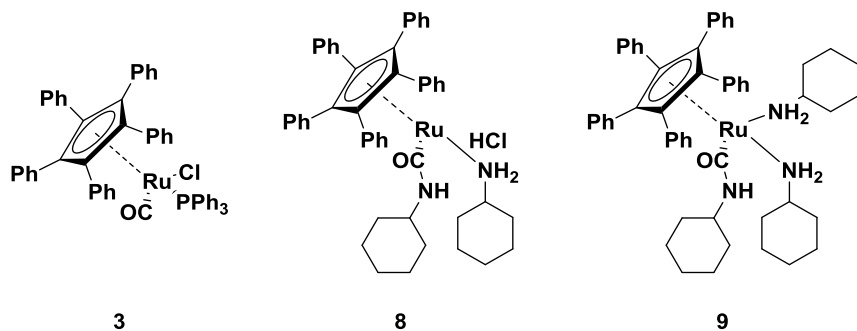

Table S6: ESI-MS analysis from the mixture of complex 3 with 10 equiv. cyclohexylamine heated to 90°C for 4 days.

| Entry | Mass found | Corresponding complex                                       |
|-------|------------|-------------------------------------------------------------|
| 1     | 356        | Ru(2x carbamoyl)+2H                                         |
| 2     | 547        | <b>Ru(CpPh<sub>5</sub>)</b>                                 |
| 3     | 575        | <b>3-Cl-[PPh<sub>3</sub>]</b>                               |
| 4     | 765        | <b>9</b> – COCyclohexylamine –2H <sub>2</sub><br>(imines)   |
| 5     | 793        | <b>8</b> – HCl + Na –2H                                     |
| 6     | 809        | <b>8</b> + H/ <b>3-Cl-CO</b>                                |
| 7     | 874        | <b>3</b> + 2H / <b>9</b> + 3H                               |
| 8     | 1094       | <b>Ru<sub>2</sub>(CpPh<sub>5</sub>)<sub>2</sub></b>         |
| 9     | 1120       |                                                             |
| 10    | 1229       |                                                             |
| 11    | 1257       | <b>3+9-[PPh<sub>3</sub>]-2xCyclohexylamine-CO</b>           |
| 12    | 1285       | <b>3+9-[PPh<sub>3</sub>]-2xCyclohexylamine</b>              |
| 13    | 1305       |                                                             |
| 14    | 1313       | 2x <b>3</b> +Cyclohexylamine+Na+K-2Cl                       |
| 15    | 1338       | 2x <b>8</b> – 2xCOCyclohexylamine - 2Cl + 2Na               |
| 16    | 1366       | 2x <b>8</b> – COCyclohexylamine, Cyclohexylamine –2Cl + 2Na |
| 17    | 1394       | 2x <b>8</b> – 2Cyclohexylamine –2Cl + 2Na                   |
| 18    | 1493       | 2x <b>8</b> – Cyclohexylamine –2Cl + 2Na                    |

# Display Report

**Analysis Info**  
Analysis Name: D:\Data\Alans Data March 2014\260314\_Dennis Pingen 1017DP14.d  
Method: 160913alanstune\_low.m  
Sample Name: Dennis Pingen 1017DP14  
Comment: Dennis Pingen 1017DP14

**Acquisition Date:** 3/26/2014 1:49:01 PM  
**Operator:** Bruker UK  
**Instrument:** microTOF  
**8213750.10408**

**Acquisition Parameter**

|             |            |                      |          |                  |           |
|-------------|------------|----------------------|----------|------------------|-----------|
| Source Type | ESI        | Ion Polarity         | Positive | Set Nebulizer    | 0.4 Bar   |
| Focus       | Not active | Set Capillary        | 4500 V   | Set Dry Heater   | 160 °C    |
| Scan Begin  | 50 m/z     | Set End Plate Offset | -600 V   | Set Dry Gas      | 4.0 l/min |
| Scan End    | 3000 m/z   |                      |          | Set Divert Valve | Waste     |

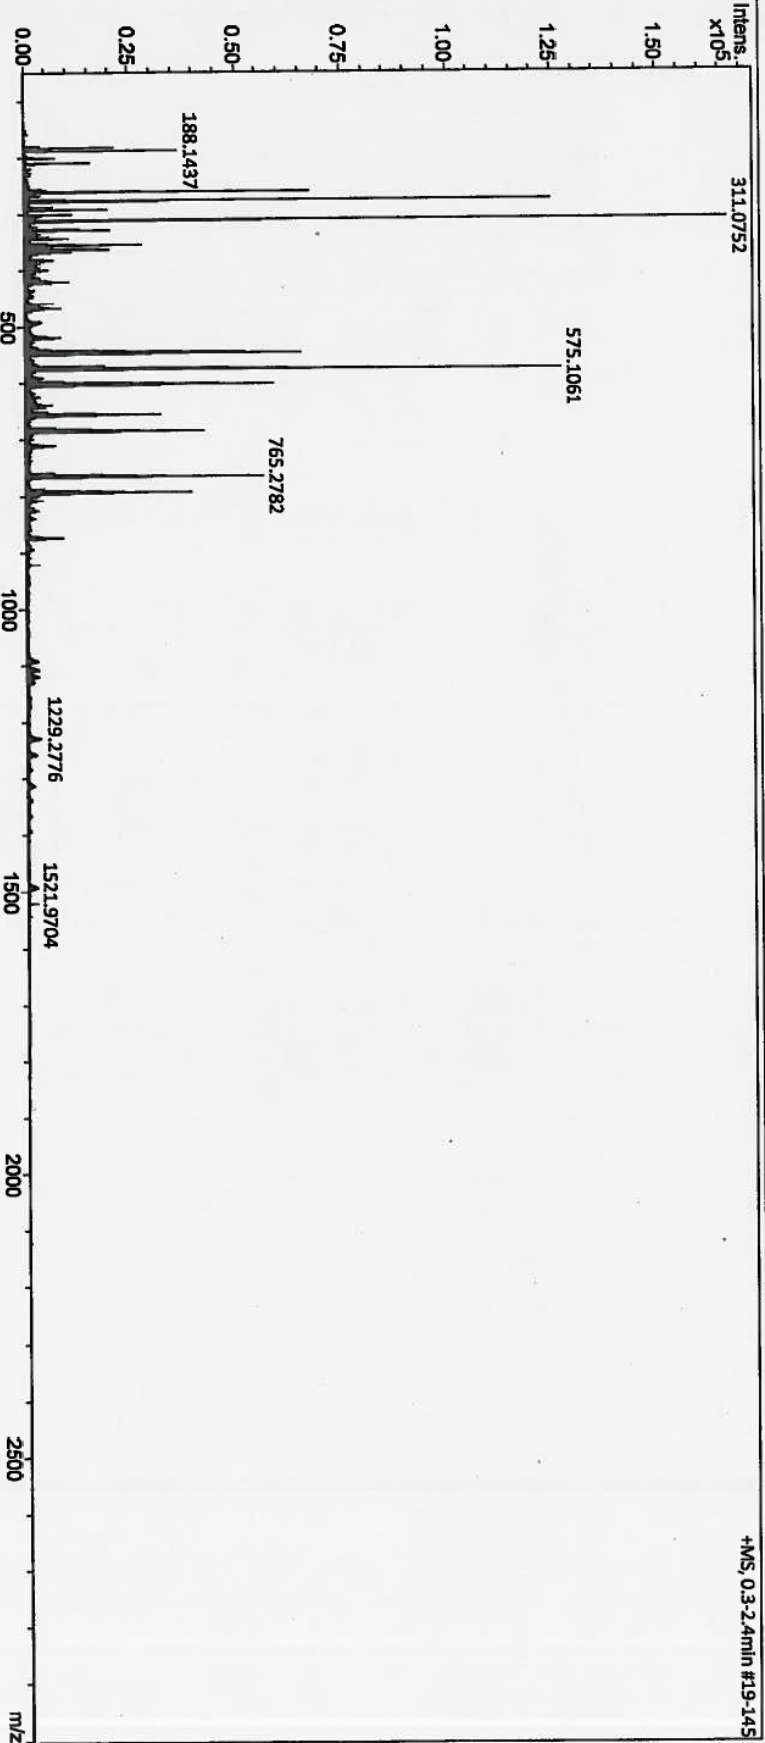

# Display Report

**Analysis Info**  
Analysis Name D:\Data\Wans Data March 2014\260314 Dennis Pingen 1017DP14.d  
Method 160913alanstune\_low.m  
Sample Name Dennis Pingen 1017DP14  
Comment Dennis Pingen 1017DP14

Acquisition Date 3/26/2014 1:49:01 PM  
Operator Bruker UK  
Instrument micrOTOF  
8213750.10408

**Acquisition Parameter**  
Source Type ESI  
Focus Not active  
Scan Begin 50 m/z  
Scan End 3000 m/z

Ion Polarity Positive  
Set Capillary 4500 V  
Set End Plate Offset -500 V

Set Nebulizer 0.4 Bar  
Set Dry Heater 180 °C  
Set Dry Gas 4.0 l/min  
Set Divert Valve Waste

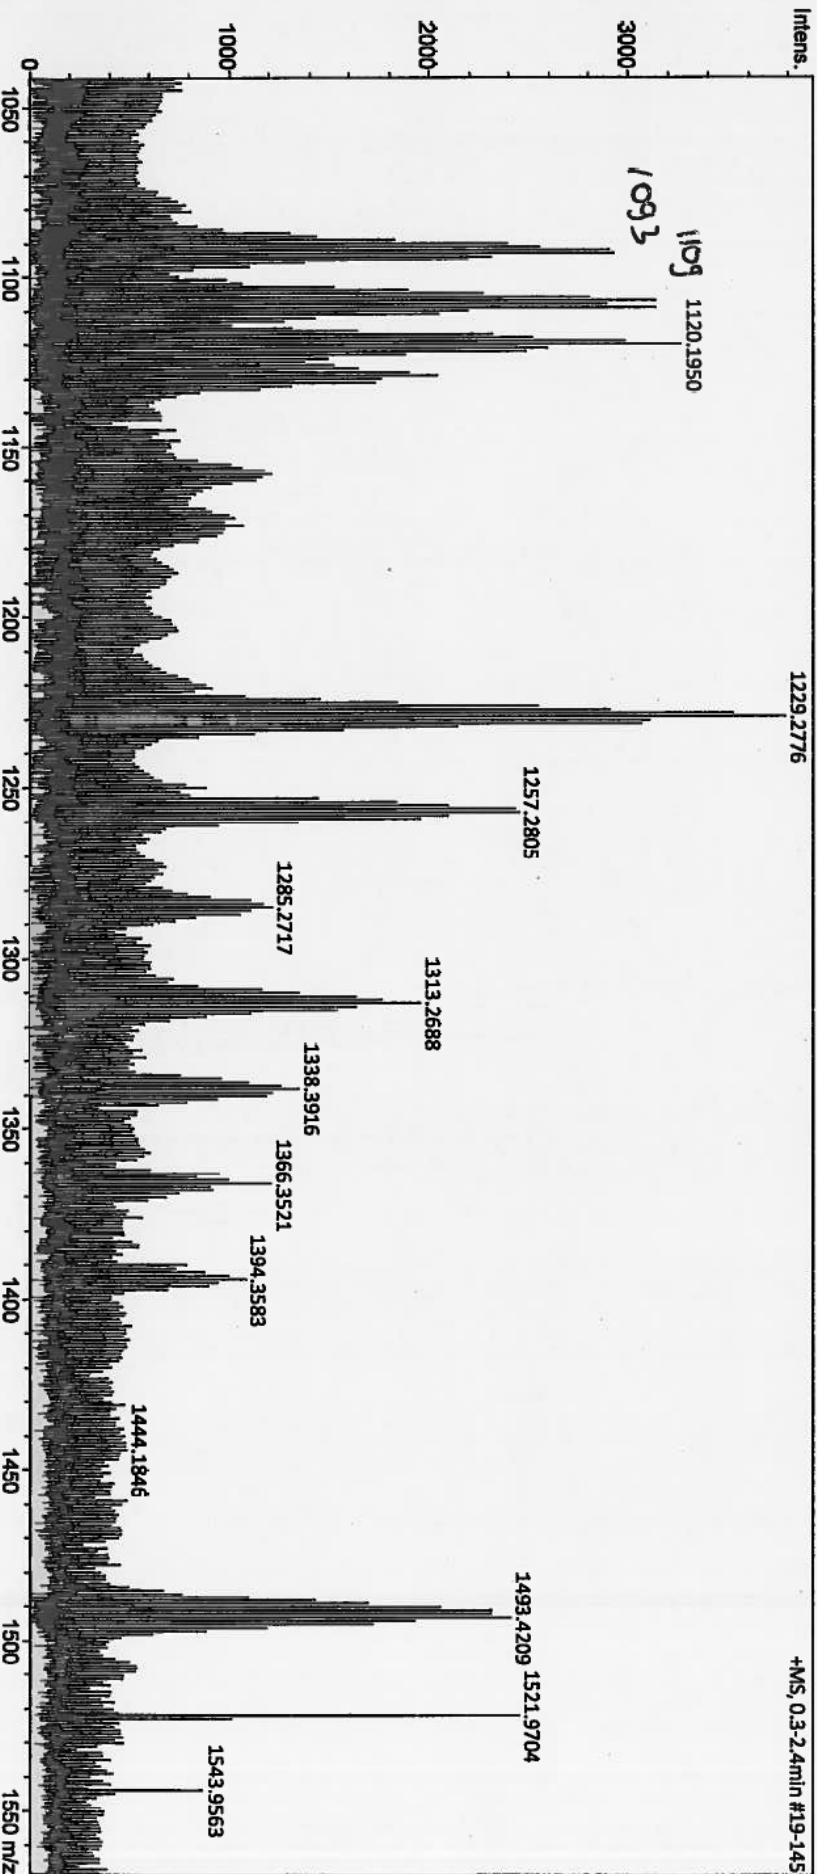



# Display Report

**Analysis Info**  
Analysis Name: D:\Data\Alans Data March 2014\260314 Dennis Pingen 1017DP14.d  
Method: 160913alans\_tune\_low.m  
Sample Name: Dennis Pingen 1017DP14  
Comment: Dennis Pingen 1017DP14

Acquisition Date: 3/26/2014 1:49:01 PM  
Operator: Bruker UK  
Instrument: micrOTOF  
8213750.10408

**Acquisition Parameter**

|             |            |                      |          |                  |           |
|-------------|------------|----------------------|----------|------------------|-----------|
| Source Type | ESI        | Ion Polarity         | Positive | Set Nebulizer    | 0.4 Bar   |
| Focus       | Not active | Set Capillary        | 4500 V   | Set Dry Heater   | 180 °C    |
| Scan Begin  | 50 m/z     | Set End Plate Offset | -500 V   | Set Dry Gas      | 4.0 l/min |
| Scan End    | 3000 m/z   |                      |          | Set Divert Valve | Waste     |

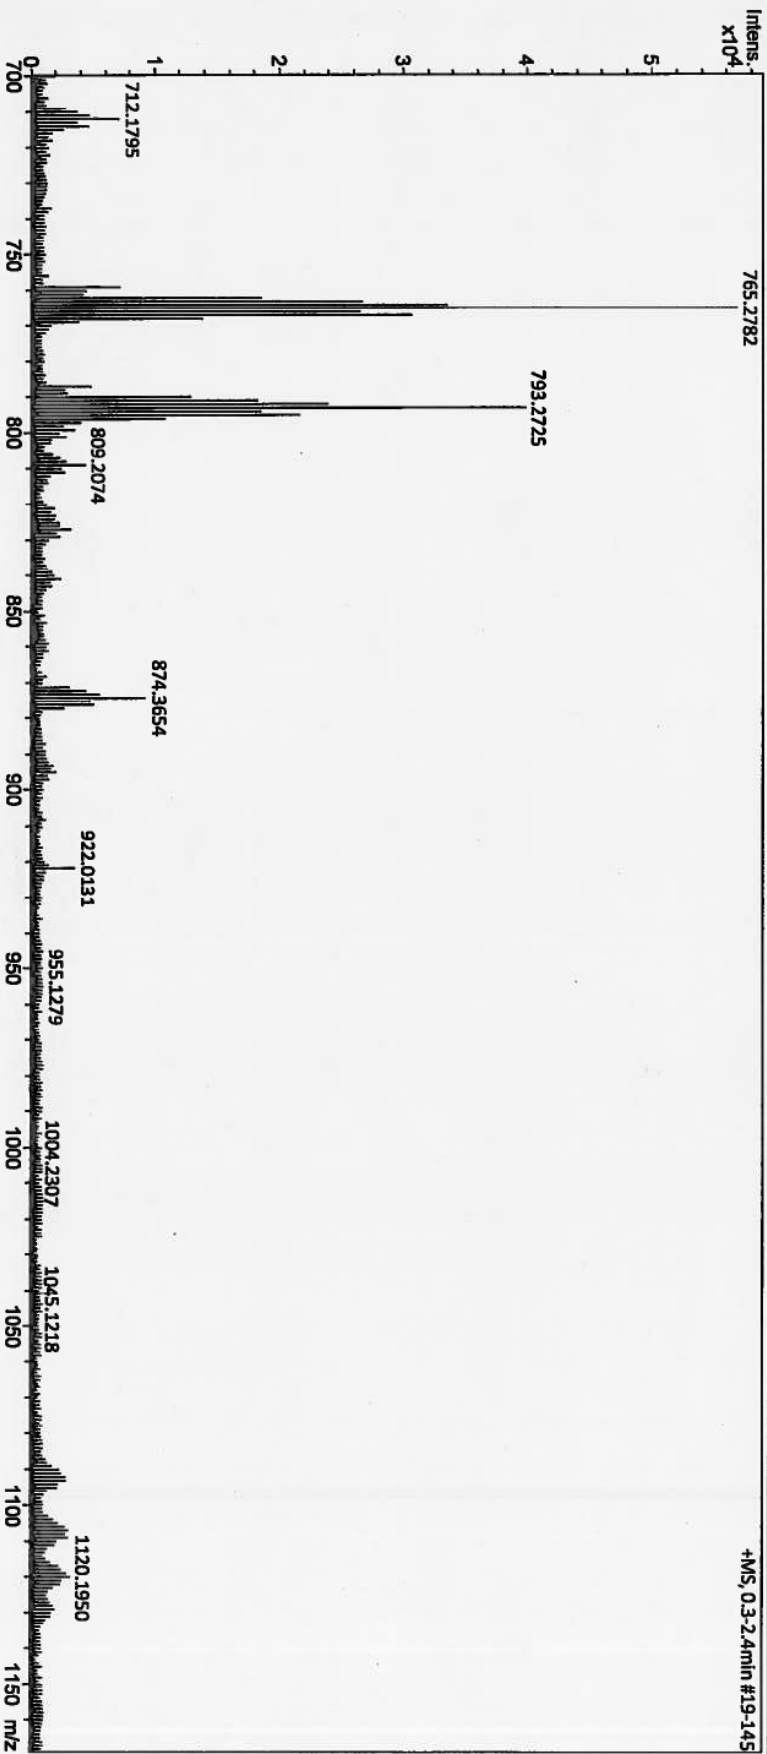

# Display Report

**Analysis Info**  
Analysis Name: D:\Data\Alans Data March 2014\260314 Dennis Pinggen 1017DP14.d  
Method: 160913alanslure\_low.m  
Sample Name: Dennis Pinggen 1017DP14  
Comment: Dennis Pinggen 1017DP14

**Acquisition Date:** 3/26/2014 1:49:01 PM  
**Operator:** Bruker UK  
**Instrument:** micrOTOF  
**8213750.10408**

**Acquisition Parameter**

|             |            |                      |          |                  |           |
|-------------|------------|----------------------|----------|------------------|-----------|
| Source Type | ESI        | Ion Polarity         | Positive | Set Nebulizer    | 0.4 Bar   |
| Focus       | Not active | Set Capillary        | 4500 V   | Set Dry Heater   | 180 °C    |
| Scan Begin  | 50 m/z     | Set End Plate Offset | -500 V   | Set Dry Gas      | 4.0 l/min |
| Scan End    | 3000 m/z   |                      |          | Set Divert Valve | Waste     |

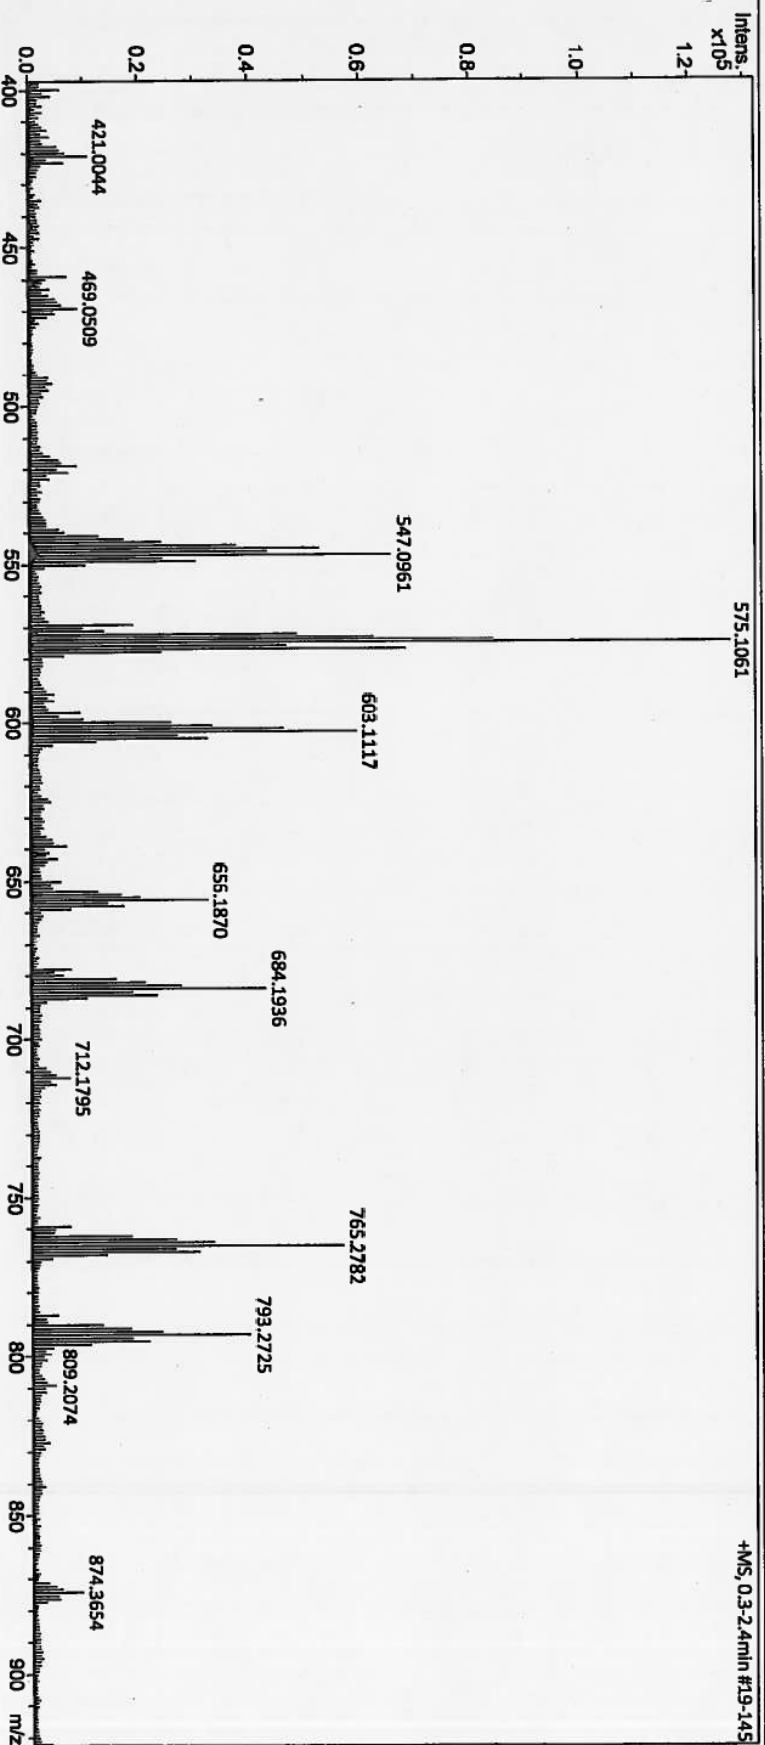

## GC-Analysis

Yields of the catalytic runs have been determined by the area of the GC signal. The retention times of the reaction outcome were compared with the retention times of the neat components. Response factors for cyclohexylamine, dicyclohexylamine and dicyclohexylimine were determined and used in the calculation.

### *GC Method Details:*

#### Amine Alkylation / Higher Start-Fast Pure Components

|                         |                                                      |
|-------------------------|------------------------------------------------------|
| Injection Mode / ratio: | Split / 100                                          |
| Temperature:            | 270°C                                                |
| Carrier Gas:            | He                                                   |
| Flow Control Mode:      | Pressure                                             |
| Pressure:               | 121.0 kPa                                            |
| Total Flow:             | 144.0 mL/min                                         |
| Column Flow:            | 0.70 mL/min                                          |
| Liner Velocity:         | 25.8 cm/sec                                          |
| Column type:            | Ultra-2 serial Nr.: US8649351H                       |
| Column length:          | 25 m, 0.33 µm film thickness, 0.20 mm inner diameter |
| Column Max. Temp. :     | 310°C                                                |
| Pressure program:       | 121.0 -> 164.0 @ 1.8 kPa/min 164.0 hold 15 min       |
| Temperature program:    | 80°C -> 270°C @ 8°C/min 270 hold 15 min              |

## References

- [1] B. Martín-Matute, M. Edin, K. Bogár, B. Kaynak, J.-E. Bäckvall, *J. Am. Chem. Soc.* **2005**, *127*, 8817-8825.
- [2] S.-B. Ko, B. Baburaj, M.-J. Kim, J. Park, *J. Org. Chem.* **2007**, *72*, 6860-6864.
